# Supplementary material for: Exploring the miRNA-mRNA Regulatory Network in Clear Cell Renal Cell Carcinomas by Next-Generation Sequencing Expression Profiles
Source: Hindawi journal article supplement (doi:10.1155/2014/948408), 2014-01-01
Supplement: f1 [file 948408.f1.xls]

## Sheet: T1
ncRNA	Control	Cancer	log2FoldChange	FDR
hsa-miR-363-3p	5076.33	645.076	-2.97625	1.20814e-21
hsa-miR-500a-3p	1289.69	221.65	-2.54067	4.1147e-19
hsa-miR-206	291.348	14.452	-4.3334	6.3156e-08
hsa-miR-10b-3p	153.08	34.0758	-2.16747	8.23686e-08
hsa-miR-106a-5p	396.714	64.421	-2.6225	2.81548e-07
hsa-miR-135a-5p	1127.62	82.8554	-3.76654	5.44839e-07
hsa-miR-660-5p	981.728	158.147	-2.63405	1.56139e-06
hsa-miR-3065-5p	77.5163	10.2403	-2.92025	3.84163e-05
hsa-miR-30c-2-3p	12274.8	4399.26	-1.48037	5.74163e-05
hsa-miR-335-5p	781.068	258.245	-1.59671	6.28935e-05
hsa-miR-514a-5p	66.8293	0.258724	-8.01293	6.38927e-05
hsa-miR-129-1-3p	45.1231	0.11274	-8.64473	0.000119988
hsa-miR-216b	402.108	17.5999	-4.51394	0.000128128
hsa-miR-873-5p	17.5194	0.941193	-4.21832	0.000186263
hsa-miR-3622a-5p	3.81457	0	-Inf	0.000321813
hsa-miR-188-5p	80.6898	15.7214	-2.35966	0.000594399
hsa-miR-584-5p	7.39897	37.2415	2.33152	0.000608313
hsa-miR-590-3p	33.8207	158.078	2.22466	0.000744389
hsa-miR-362-5p	302.801	62.0476	-2.28693	0.000877909
hsa-miR-99a-3p	102.013	41.6799	-1.29133	0.00106123
hsa-sno-ACA61	180.289	693.034	1.94262	0.00115355
hsa-miR-1251	12.7767	0.27765	-5.52411	0.00129945
hsa-miR-3065-3p	192.959	10.5346	-4.19508	0.00134234
hsa-miR-142-5p	501.178	1769.88	1.82025	0.00136324
hsa-miR-2277-5p	0.312275	4.2614	3.77044	0.00174901
hsa-miR-502-5p	15.2098	1.5339	-3.30972	0.00190252
hsa-miR-514b-5p	38.0209	0.182864	-7.69987	0.00577078
hsa-miR-122-3p	0	11.5249	Inf	0.00577078
hsa-sno-mgh18S-121	47.0783	111.93	1.24947	0.00687682
hsa-miR-508-3p	2934.56	49.3759	-5.89319	0.00741826
hsa-miR-30a-5p	985714	439982	-1.16373	0.00766469
hsa-miR-510	34.0703	1.64697	-4.37063	0.00766469
hsa-miR-34a-5p	76.0914	383.473	2.33332	0.00921823
hsa-sno-ACA52	9.76945	28.3459	1.53679	0.0104851
hsa-miR-324-3p	75.1876	23.2944	-1.69051	0.0111679
hsa-miR-362-3p	119.818	22.708	-2.39957	0.0115437
hsa-miR-942	0.879473	5.32511	2.5981	0.0125162
hsa-miR-509-5p	681.717	10.9504	-5.96012	0.0139859
hsa-miR-532-5p	3880.26	1001.31	-1.95426	0.0174137
hsa-miR-514a-3p	3157.43	32.1552	-6.61756	0.0176681
hsa-miR-129-5p	48.9097	1.85121	-4.72358	0.0183508
hsa-miR-548n	0.890995	4.84041	2.44164	0.0234704
hsa-miR-106b-3p	294.412	680.866	1.20954	0.0234704
hsa-miR-1247-5p	5.85416	0.575015	-3.34779	0.0234704
hsa-miR-184	2197.09	45.4981	-5.59364	0.0244391
hsa-miR-885-5p	0.626816	7.63137	3.60583	0.0323781
hsa-miR-548o-3p	7.42624	14.3099	0.946309	0.0330941
hsa-miR-509-3p	697.355	16.8249	-5.37322	0.0339159
hsa-miR-16-1-3p	4.63783	15.041	1.69738	0.0339159
hsa-miR-3182	4.3258	26.2018	2.59863	0.0370315
hsa-tRNA-Leu-TTA(m)	7172.82	2773.94	-1.3706	0.0380166
hsa-miR-508-5p	45.1415	0.876989	-5.68575	0.0380166
hsa-miR-20b-5p	598.229	61.0835	-3.29184	0.0391176
hsa-miR-378a-5p	45.6007	9.20164	-2.3091	0.0399407
hsa-miR-509-3-5p	1160.78	133.492	-3.12026	0.0421517
hsa-miR-500b	28.1841	3.64931	-2.94919	0.0432757
hsa-miR-500a-5p	28.1841	3.64931	-2.94919	0.0432757
hsa-miR-514b-3p	17.4903	0	-Inf	0.0434255
hsa-miR-1296	13.699	2.95229	-2.21416	0.0434255
hsa-miR-19a-5p	0	3.22374	Inf	0.0463039
hsa-miR-873-3p	5.69216	0	-Inf	0.050232
hsa-miR-513a-3p	5.81604	0	-Inf	0.0507156
hsa-sno-HBII-240	3.36141	14.5498	2.11386	0.0512675
hsa-miR-2392	35.4869	0.384167	-6.52941	0.0512675
hsa-sno-ACA44	54.3103	201.324	1.89022	0.0543951
hsa-miR-192-3p	51.3293	13.6482	-1.91108	0.0548252
hsa-miR-132-3p	326.763	159.809	-1.03189	0.0577428
hsa-tRNA-Ser-TCA(m)	1255.44	92.8619	-3.75696	0.0581778
hsa-miR-188-3p	1.7265	0	-Inf	0.0588383
hsa-miR-506-3p	509.891	3.41707	-7.22128	0.0636007
hsa-miR-4636	5.47896	0.368065	-3.89587	0.0650724
hsa-miR-488-3p	0.944944	0	-Inf	0.0650724
hsa-sno-HBII-85-25	40.1403	18.1729	-1.14327	0.0650724
hsa-tRNA-Gln-CAG	6144.22	12085.6	0.975983	0.0650724
hsa-miR-532-3p	1526.84	254.572	-2.5844	0.0650724
hsa-miR-24-2-5p	127.791	292.762	1.19594	0.0650724
hsa-miR-7-5p	439.966	3243.48	2.88208	0.0650724
hsa-miR-210	1062.71	7973.01	2.90737	0.0650724
hsa-miR-16-2-3p	35.8533	123.425	1.78345	0.0650724
hsa-miR-6512-5p	3.38986	0	-Inf	0.0650724
hsa-sno-ACA9	10.5387	97.6165	3.21142	0.0703415
hsa-miR-642a-5p	0	4.37113	Inf	0.0703415
hsa-miR-361-3p	98.087	215.996	1.13887	0.0703415
hsa-miR-378h	28.2466	4.43108	-2.67235	0.0709034
hsa-miR-876-5p	3.60272	0.182864	-4.30024	0.0709034
hsa-miR-9-5p	802.326	106.688	-2.91079	0.0721588
hsa-sno-U43	3183.05	5564.42	0.80582	0.0721588
hsa-miR-29b-2-5p	113.177	41.3238	-1.45353	0.0721588
hsa-sno-ACA11	0	3.07764	Inf	0.0732881
hsa-miR-21-5p	185761	1.12546e+06	2.59899	0.0807162
hsa-sno-SNORD119	632.8	1428.94	1.17513	0.0832756
hsa-miR-21-3p	1396.86	9334.79	2.74043	0.092286
hsa-sno-U44	909.047	2134.72	1.23162	0.093559
hsa-miR-204-5p	3349.35	393.498	-3.08945	0.0945928
hsa-miR-550a-5p	0.769441	7.31953	3.24987	0.0945928
hsa-miR-33b-5p	15.2506	63.6539	2.06138	0.0945928
hsa-miR-488-5p	2.3774	0	-Inf	0.0945928
hsa-miR-1277-5p	1.48624	4.95017	1.73581	0.0945928
hsa-sno-HBII-180A	3.98509	20.5019	2.36307	0.0945928
hsa-miR-3158-3p	12.9413	44.0749	1.76797	0.0945928
hsa-sno-U41	5.83187	14.9521	1.35832	0.0963681
hsa-miR-203b-3p	6.6947	0.368065	-4.18499	0.0963681
hsa-sno-U49B	2.02575	6.58333	1.70036	0.097532
hsa-miR-18b-5p	14.9969	4.40974	-1.7659	0.107336
hsa-sno-U89	76.1898	171.189	1.16792	0.107336
hsa-miR-501-3p	482.729	97.0763	-2.31402	0.107336
hsa-let-7i-5p	9986.47	21984.8	1.13846	0.107336
hsa-miR-885-3p	3.97408	80.4894	4.34011	0.107336
hsa-sno-HBII-85-5	49.7713	20.2233	-1.29929	0.107336
hsa-sno-HBII-85-7	49.7713	20.2233	-1.29929	0.107336
hsa-miR-3613-5p	14.5495	90.9926	2.64478	0.107336
hsa-sno-U74	573.383	1332.63	1.21671	0.107336
hsa-miR-378e	38.8853	8.96095	-2.1175	0.107336
hsa-miR-4445-5p	2.58678	0	-Inf	0.107336
hsa-miR-224-5p	31.7391	329.802	3.37727	0.107336
hsa-sno-mgh28S-2411	293.206	468.241	0.675335	0.107336
hsa-miR-154-5p	11.4792	3.20602	-1.84017	0.10819
hsa-miR-4770	0	1.60851	Inf	0.10819
hsa-miR-9-3p	47.1023	6.8613	-2.77924	0.10819
hsa-miR-30d-5p	157672	90468.4	-0.801443	0.10819
hsa-tRNA-Gln-CAA_	39556.5	3076.78	-3.68442	0.108349
hsa-miR-429	2592.92	850.484	-1.60822	0.109793
hsa-miR-1304-5p	1.30337	5.31711	2.0284	0.109793
hsa-miR-548ac	0.134892	3.73431	4.79097	0.1144
hsa-miR-30c-5p	16916.8	6148.75	-1.46009	0.114957
hsa-miR-34a-3p	25.2944	168.421	2.73518	0.120408
hsa-miR-502-3p	601.32	123.185	-2.28731	0.121841
hsa-miR-3909	1.97933	7.59957	1.9409	0.121841
hsa-miR-548e	48.3487	116.112	1.26398	0.124407
hsa-miR-4422	0	16.544	Inf	0.124407
hsa-miR-3176	1.05548	6.00382	2.50799	0.125181
hsa-miR-130b-3p	204.815	439.786	1.10248	0.125685
hsa-miR-589-5p	45.866	96.2265	1.06901	0.125685
hsa-miR-4517	0	3.79059	Inf	0.129858
hsa-sno-U36A	4.87541	12.991	1.41392	0.133404
hsa-miR-124-3p	279.923	36.9453	-2.92156	0.134506
hsa-miR-590-5p	38.5587	81.7157	1.08356	0.134506
hsa-miR-15b-3p	7.83658	21.6577	1.46659	0.134506
hsa-sno-U81	571.609	1761.61	1.6238	0.135704
hsa-miR-199a-5p	1113.67	476.592	-1.2245	0.135704
hsa-tRNA-Thr-ACG_	29.5202	106.811	1.85528	0.138271
hsa-sno-U38A	80.3326	134.987	0.748768	0.138271
hsa-sno-HBII-85-26	32.1805	17.0932	-0.912763	0.144851
hsa-sno-U15A	55.3632	185.604	1.74522	0.154984
hsa-sno-HBII-85-27	21.6407	8.62311	-1.32747	0.161706
hsa-miR-10b-5p	235514	50248.7	-2.22865	0.16261
hsa-miR-3154	13.803	1.35639	-3.34714	0.163224
hsa-sno-U66	11.8318	22.3284	0.916205	0.163224
hsa-miR-934	21.9579	0	-Inf	0.163684
hsa-sno-U78	256.477	2643.61	3.36561	0.166943
hsa-miR-4699-5p	1.00001	4.05325	2.01906	0.167262
hsa-miR-4445-3p	2.17491	0	-Inf	0.175336
hsa-miR-660-3p	34.4643	9.84056	-1.80829	0.175336
hsa-miR-6723-5p	3.63676	0.416869	-3.12498	0.175336
hsa-miR-450b-3p	0	1.63995	Inf	0.176877
hsa-miR-3194-5p	0	1.525	Inf	0.177168
hsa-miR-4484	3.03275	0	-Inf	0.177941
hsa-miR-663a	9.42432	31.821	1.75552	0.17811
hsa-sno-ACA47	80.9677	146.05	0.851047	0.180671
hsa-miR-204-3p	539.785	129.037	-2.0646	0.180671
hsa-miR-4470	0	1.96035	Inf	0.181815
hsa-sno-U102	81.3441	141.39	0.797575	0.181815
hsa-miR-6503-3p	33.5294	161.642	2.2693	0.181815
hsa-miR-106a-3p	3.18603	0.274297	-3.53795	0.181815
hsa-sno-U31	949.88	4871.27	2.35848	0.184826
hsa-miR-3123	3.55043	0.148683	-4.57769	0.188729
hsa-miR-378d	402.213	144.396	-1.47793	0.19317
hsa-miR-200b-5p	873.839	426.163	-1.03596	0.195075
hsa-sno-SNORD121A	1.48096	3.74204	1.33729	0.204398
hsa-miR-190a	590.663	122.491	-2.26966	0.206929
hsa-miR-339-3p	714.73	1537.55	1.10516	0.206929
hsa-miR-342-3p	1757.51	4974.08	1.5009	0.211491
hsa-sno-U58C	48.8159	112.097	1.19933	0.212533
hsa-miR-876-3p	6.61466	0	-Inf	0.214467
hsa-miR-6507-5p	4.63731	0	-Inf	0.217703
hsa-miR-513a-5p	44.0869	0.921818	-5.57972	0.21886
hsa-miR-378a-3p	107872	33080.4	-1.70527	0.21886
hsa-miR-3941	0	1.63463	Inf	0.219581
hsa-miR-4695-5p	3.2866	0.297365	-3.46629	0.219581
hsa-miR-33a-3p	5.07765	1.21511	-2.06308	0.219581
hsa-sno-U71d	2.78598	12.6731	2.18552	0.219581
hsa-sno-U30	141.144	518.788	1.87798	0.219581
hsa-sno-HBII-180C	13.3615	71.0034	2.4098	0.219581
hsa-miR-34b-5p	0.918344	10.7206	3.5452	0.220668
hsa-miR-501-5p	39.1728	6.57918	-2.57387	0.223825
hsa-sno-ACA16	8.21401	27.2816	1.73177	0.224189
hsa-miR-642a-3p	5.29656	49.773	3.23223	0.2252
hsa-sno-U37	54.9946	175.139	1.67114	0.229657
hsa-miR-652-3p	575.794	254.922	-1.17549	0.231216
hsa-miR-211-5p	1.88658	0	-Inf	0.231216
hsa-sno-HBII-85-15	52.336	25.9747	-1.01069	0.231355
hsa-miR-25-5p	96.8414	190.63	0.977076	0.231777
hsa-miR-203a	1089.67	364.416	-1.58023	0.231933
hsa-sno-HBII-82	8.4562	19.5584	1.20971	0.231933
hsa-sno-HBII-85-14	53.5929	27.7066	-0.95181	0.233113
hsa-miR-4802-3p	31.4245	6.23048	-2.33448	0.23844
hsa-miR-296-5p	3.56525	10.0978	1.50197	0.241003
hsa-miR-4800-5p	1.88043	0.173603	-3.4372	0.248522
hsa-miR-122-5p	1115.11	9197.88	3.04412	0.248522
hsa-sno-U95	52.9586	117.177	1.14575	0.253887
hsa-sno-U56	11.8157	27.7192	1.23018	0.253994
hsa-miR-194-5p	11979.5	3979.83	-1.58979	0.253994
hsa-sno-HBII-202	279.254	498.957	0.837334	0.262149
hsa-miR-3118	0	11.633	Inf	0.265452
hsa-sno-U57	240.76	563.67	1.22725	0.266711
hsa-sno-ACA48	24.8776	52.742	1.08411	0.26745
hsa-tRNA-Val-GTA	1132.33	1625.13	0.521254	0.269354
hsa-tRNA-Asn-AAC	2145.68	4953.86	1.20712	0.2709
hsa-tRNA-Arg-CGA	379.684	957.31	1.33419	0.2709
hsa-miR-422a	80.1265	24.5126	-1.70876	0.2709
hsa-miR-1243	0	1.0058	Inf	0.277248
hsa-sno-SNORD121B	16.2294	36.2369	1.15885	0.28043
hsa-miR-133a	30.1675	9.47227	-1.67121	0.28128
hsa-miR-30b-5p	3969.02	1961.16	-1.01707	0.283152
hsa-miR-378i	470.474	157.904	-1.57507	0.283161
hsa-miR-4504	9.22649	2.37274	-1.95923	0.283161
hsa-miR-218-1-3p	9.65088	4.11467	-1.22988	0.285657
hsa-miR-4317	0	1.22825	Inf	0.288425
hsa-miR-548an	0.413693	6.12307	3.88762	0.288425
hsa-miR-4461	12.7122	2.2214	-2.51667	0.288425
hsa-miR-374b-3p	9.16486	20.0811	1.13165	0.288425
hsa-miR-214-5p	21.2295	7.56822	-1.48804	0.289595
hsa-miR-5695	0	1.43377	Inf	0.289595
hsa-miR-342-5p	133.298	255.726	0.93994	0.290484
hsa-sno-U77	8.91991	23.7564	1.41322	0.295777
hsa-miR-296-3p	0.954308	4.03726	2.08085	0.297061
hsa-miR-4524a-3p	5.79017	0.822421	-2.81566	0.297273
hsa-miR-550a-3-5p	0.100872	1.20697	3.5808	0.317352
hsa-miR-6515-5p	1.33747	0	-Inf	0.321262
hsa-sno-HBII-420	165.062	548.284	1.73191	0.324199
hsa-sno-snR38A	2.90479	18.321	2.65699	0.327693
hsa-miR-363-5p	1.30817	0	-Inf	0.327693
hsa-miR-6503-5p	17.7915	56.3345	1.66283	0.329692
hsa-miR-144-3p	69.7536	311.3	2.15796	0.329692
hsa-sno-HBII-52-22	2.0468	0.609557	-1.74754	0.332415
hsa-miR-548k	19.8711	39.1179	0.977159	0.337901
hsa-sno-U16	68.3615	156.696	1.19671	0.342149
hsa-sno-U75	68.4803	311.71	2.18644	0.347022
hsa-sno-HBII-99B	50.2128	130.705	1.38018	0.34709
hsa-sno-U58B	96.3124	181.22	0.911948	0.352139
hsa-miR-3200-3p	10.6774	4.00404	-1.41504	0.356359
hsa-miR-33a-5p	206.039	419.539	1.02589	0.362641
hsa-miR-324-5p	195.869	69.1406	-1.50229	0.363618
hsa-miR-338-3p	67.6374	37.3056	-0.858429	0.363974
hsa-miR-3605-3p	1.89765	0.453186	-2.06604	0.380363
hsa-miR-217	842.074	239.813	-1.81204	0.380363
hsa-miR-193b-5p	44.3227	67.7806	0.612828	0.380363
hsa-miR-1976	12.6649	4.57938	-1.46761	0.382135
hsa-miR-6500-3p	0.60932	0	-Inf	0.382135
hsa-miR-664a-3p	240.712	153.685	-0.647334	0.382135
hsa-sno-U92	36.542	60.1117	0.718091	0.382135
hsa-miR-513b	14.0189	0.652206	-4.42591	0.382135
hsa-miR-4453	0	1.84534	Inf	0.382135
hsa-sno-ACA32	14.453	21.9603	0.603532	0.382135
hsa-miR-223-5p	3.93372	10.6212	1.43298	0.382135
hsa-miR-592	1.75308	20.3492	3.53701	0.382135
hsa-miR-877-5p	416.388	182.504	-1.19	0.382135
hsa-miR-302b-3p	0.725296	0	-Inf	0.382135
hsa-sno-U28	330.557	689.532	1.06072	0.382135
hsa-sno-snR39B	473.976	827.226	0.803467	0.382414
hsa-miR-4645-3p	0.975076	2.62481	1.42862	0.382414
hsa-miR-4326	5.58242	14.1729	1.34417	0.382414
hsa-miR-2681-3p	0	1.12423	Inf	0.382414
hsa-miR-144-5p	1200.26	4114.9	1.77751	0.383107
hsa-sno-ACA40	7.74659	13.2893	0.778626	0.384292
hsa-sno-U101	253.516	389.671	0.620179	0.385997
hsa-miR-140-3p	110470	220632	0.997992	0.386514
hsa-miR-551b-3p	30.8752	11.4082	-1.43638	0.387942
hsa-miR-328	102.335	57.852	-0.822856	0.390967
hsa-sno-mgU6-77	254.07	652.892	1.36162	0.394065
hsa-rRNA-LSU-rRNA_Hsa	3.06943e+06	3.94349e+06	0.3615	0.396696
hsa-miR-675-3p	7.15546	2.34372	-1.61025	0.398163
hsa-miR-1285-3p	4.17678	7.70253	0.882941	0.398163
hsa-miR-1179	1.16137	3.22401	1.47303	0.398163
hsa-miR-339-5p	110.554	151.315	0.452798	0.398163
hsa-miR-200a-5p	90.6523	33.6205	-1.431	0.398163
hsa-sno-HBII-52-3	2.94567	0.961511	-1.61522	0.398163
hsa-sno-U83B	36.1707	104.853	1.53547	0.401675
hsa-let-7e-3p	75.6365	35.4124	-1.09483	0.401675
hsa-miR-32-3p	7.79153	2.53776	-1.61835	0.401675
hsa-sno-U47	308.975	512.281	0.729442	0.401675
hsa-miR-374a-3p	1520.83	3697.98	1.28188	0.401675
hsa-miR-4421	3.59886	0.932077	-1.94902	0.401675
hsa-miR-3934-5p	8.78238	23.7263	1.4338	0.401675
hsa-miR-3064-3p	0	0.911472	Inf	0.401675
hsa-sno-U69	37.5018	83.2404	1.15033	0.401675
hsa-miR-4652-5p	0.918082	4.48182	2.28739	0.401675
hsa-miR-570-3p	3.42071	10.7553	1.65268	0.401675
hsa-miR-1180	19.0782	9.49351	-1.00691	0.401675
hsa-miR-138-2-3p	1.62885	0	-Inf	0.401675
hsa-tRNA-Gly-GGY	10438	16522.1	0.662543	0.401675
hsa-miR-513c-5p	36.5669	1.42699	-4.67949	0.401675
hsa-miR-3620-3p	1.14413	0	-Inf	0.408069
hsa-sno-U19	5.75557	10.5949	0.880343	0.408927
hsa-miR-138-1-3p	28.8078	6.81821	-2.07899	0.410082
hsa-miR-548j	7.37689	12.9082	0.807199	0.410082
hsa-sno-U51	32.5047	106.966	1.71844	0.410082
hsa-miR-125b-2-3p	445.112	228.598	-0.961357	0.410082
hsa-miR-1269b	4.08431	67.5485	4.04776	0.410082
hsa-sno-U18C	6.78051	28.7148	2.08233	0.410082
hsa-tRNA-SeC(e)-TGA	1125.94	1672.92	0.571238	0.411562
hsa-sno-U60	382.921	737.527	0.94565	0.414068
hsa-miR-6514-5p	10.0038	4.53051	-1.1428	0.414068
hsa-miR-574-3p	331.4	197.82	-0.744387	0.416308
hsa-sno-U53	8.88741	18.266	1.03932	0.420844
hsa-miR-155-5p	410.121	5195.28	3.66308	0.421204
hsa-tRNA-Asn-AAT	40.5743	131.282	1.69402	0.42266
hsa-sno-U63	2348.95	7278.87	1.6317	0.423128
hsa-miR-222-3p	4996.84	12474.1	1.31985	0.424426
hsa-miR-142-3p	969.01	5605.22	2.53219	0.424426
hsa-miR-4757-3p	0	0.717306	Inf	0.425867
hsa-tRNA-Ile-ATC	17.3984	23.8687	0.456168	0.425867
hsa-miR-4423-5p	0.659489	0	-Inf	0.425867
hsa-sno-mgU2-19/30	51.4656	131.839	1.35709	0.425867
hsa-let-7a-2-3p	0.669694	0	-Inf	0.425867
hsa-sno-HBII-82B	37.9792	73.5393	0.953305	0.425867
hsa-miR-598	1136.32	579.889	-0.970525	0.425867
hsa-miR-505-3p	39.7535	20.8814	-0.928862	0.425867
hsa-miR-496	0.477115	2.81749	2.562	0.427342
hsa-sno-U70B	13.7712	30.3458	1.13984	0.427562
hsa-sno-snR38B	682.505	2184.96	1.6787	0.427957
hsa-sno-U83A	22.9596	71.7921	1.64473	0.427957
hsa-miR-28-3p	4118.79	6597.06	0.679602	0.427957
hsa-sno-U58A	227.374	672.64	1.56477	0.427957
hsa-miR-4286	4.23436	0.795097	-2.41294	0.435297
hsa-sno-HBII-336	331.756	2133.29	2.68488	0.435297
hsa-miR-4742-3p	10.1177	4.33986	-1.22116	0.435297
hsa-sno-U70	14.253	30.5713	1.10091	0.435612
hsa-sno-U76	61.1632	181.832	1.57187	0.439629
hsa-miR-92a-3p	8472.78	5712.84	-0.568628	0.439629
hsa-miR-378b	78.7181	27.5407	-1.51513	0.439629
hsa-miR-34b-3p	0.357881	2.23052	2.63983	0.439629
hsa-sno-ACA63	7.80515	19.7824	1.34172	0.440973
hsa-miR-506-5p	5.90143	0	-Inf	0.440973
hsa-miR-4755-3p	0	0.511161	Inf	0.443472
hsa-miR-3140-3p	0.732603	2.07857	1.50448	0.443476
hsa-miR-542-5p	87.4444	34.2252	-1.35331	0.446494
hsa-miR-187-3p	346.747	112.071	-1.62947	0.446494
hsa-miR-4659a-3p	0.551814	2.40951	2.12649	0.446494
hsa-miR-200a-3p	7339.62	3987.61	-0.880178	0.446494
hsa-miR-3614-5p	0.201072	3.78445	4.2343	0.446494
hsa-miR-4677-3p	17.9339	43.9073	1.29177	0.463783
hsa-miR-708-3p	90.2125	396.207	2.13486	0.464666
hsa-miR-135a-3p	0	11.0447	Inf	0.471931
hsa-sno-U18B	89.6512	280.892	1.64762	0.479143
hsa-sno-HBII-85-4	23.321	10.25	-1.186	0.479143
hsa-miR-3074-5p	0.80296	0.097231	-3.04584	0.479143
hsa-sno-HBII-85-22	71.7689	44.0976	-0.702659	0.481178
hsa-miR-5009-5p	0	1.04252	Inf	0.481178
hsa-miR-26a-2-3p	2.59888	5.97775	1.20171	0.482479
hsa-miR-507	2.74404	0	-Inf	0.483478
hsa-miR-4705	0.211949	1.5705	2.88944	0.483478
hsa-sno-U49A	42.0448	81.3528	0.952265	0.483478
hsa-miR-4536-5p	1.05518	3.64212	1.78729	0.483478
hsa-miR-582-3p	132.892	462.504	1.79921	0.483478
hsa-sno-U80	50.8316	109.011	1.10067	0.483478
hsa-miR-139-5p	847.712	414.009	-1.03391	0.483478
hsa-miR-1293	0	4.46163	Inf	0.483478
hsa-miR-378g	28.7873	13.5113	-1.09126	0.483478
hsa-sno-U38B	300.581	651.61	1.11626	0.483478
hsa-miR-224-3p	2.47584	9.09789	1.87761	0.483478
hsa-miR-27b-5p	537.268	319.788	-0.748528	0.483478
hsa-miR-187-5p	8.04608	1.158	-2.79666	0.483478
hsa-sno-HBII-52-4	20.5377	13.4284	-0.612979	0.483478
hsa-sno-U106	34.8978	59.9189	0.779873	0.48541
hsa-miR-181d	353.134	567.114	0.683423	0.485645
hsa-miR-4450	1.74747	0	-Inf	0.486363
hsa-miR-548ah-5p	5.33713	1.31448	-2.02157	0.486363
hsa-sno-Z17B	3.06832	6.93271	1.17597	0.486363
hsa-let-7f-5p	365990	574897	0.651499	0.486363
hsa-miR-183-3p	7.02943	15.0669	1.0999	0.487699
hsa-miR-125a-5p	14938.1	9469.15	-0.657693	0.492945
hsa-miR-4485	13.6861	1.5858	-3.10943	0.492945
hsa-miR-548a-3p	13.094	33.9377	1.37399	0.492945
hsa-miR-1278	41.4241	105.712	1.3516	0.493455
hsa-tRNA-Gln-CAA	2126.9	3071.79	0.530325	0.499711
hsa-miR-4443	31.1524	105.743	1.76315	0.499972
hsa-sno-HBII-52-6	19.9477	13.0952	-0.607182	0.499972
hsa-miR-549a	0	0.651811	Inf	0.503006
hsa-sno-U96a	269.533	752.857	1.48191	0.503006
hsa-miR-16-5p	11953	18568.9	0.635517	0.503006
hsa-miR-513c-3p	3.40253	0	-Inf	0.503006
hsa-miR-345-3p	4.20738	1.41985	-1.56718	0.503006
hsa-miR-3190-3p	12.3764	43.8748	1.8258	0.503006
hsa-miR-34c-5p	400.914	4162.49	3.37608	0.503006
hsa-miR-29c-5p	290.955	177.908	-0.709662	0.503006
hsa-miR-3591-5p	2.32116	11.1239	2.26075	0.503006
hsa-sno-U71b	103.745	284.208	1.45391	0.503006
hsa-sno-HBII-99	12.2362	32.9136	1.42753	0.503006
hsa-tRNA-Gly-GGG	618.197	1126.2	0.865321	0.503006
hsa-miR-3174	0.201744	1.70443	3.0787	0.505736
hsa-miR-4435	0.403487	1.9305	2.25838	0.508194
hsa-miR-1266	5.07836	17.0245	1.74518	0.509275
hsa-miR-197-5p	0.770449	3.78487	2.29647	0.510252
hsa-miR-1973	1.12486	0	-Inf	0.515815
hsa-sno-ACA5	13.1824	22.719	0.785291	0.515815
hsa-miR-541-5p	1.14229	4.78775	2.06742	0.518137
hsa-miR-25-3p	3415.53	5388.51	0.657778	0.518137
hsa-sno-U17a	63.5829	146.305	1.20227	0.518137
hsa-sno-HBII-85-17	74.1494	44.9769	-0.721252	0.518137
hsa-miR-941	14.1984	21.6256	0.607009	0.518137
hsa-sno-HBII-419	736.949	1342.54	0.865331	0.519178
hsa-sno-HBII-85-19	74.1494	45.1157	-0.716806	0.519178
hsa-miR-1294	3.20783	11.5655	1.85016	0.519178
hsa-sno-HBII-85-20	71.4803	42.8515	-0.738199	0.520578
hsa-miR-3617-5p	0.174499	2.99756	4.1025	0.53271
hsa-sno-ACA45	4132.83	6203.25	0.585895	0.53271
hsa-miR-615-3p	122.115	46.9647	-1.37859	0.532742
hsa-miR-4680-3p	0	0.82749	Inf	0.533176
hsa-miR-5682	0	9.10513	Inf	0.533176
hsa-tRNA-Met	79.1805	210.026	1.40735	0.535651
hsa-miR-451a	8451.94	18721.8	1.14736	0.535651
hsa-tRNA-Lys-AAA	13857	21047.6	0.603042	0.535651
hsa-miR-4488	6.33298	16.1214	1.34802	0.535651
hsa-miR-708-5p	1011.8	2621.09	1.37324	0.541393
hsa-miR-3614-3p	2.12311	8.21218	1.95158	0.541393
hsa-sno-U90	16.5791	27.2902	0.719017	0.541393
hsa-sno-U42B	30.9088	73.2304	1.24443	0.541393
hsa-miR-129-2-3p	333.634	4.36519	-6.25608	0.541902
hsa-miR-374a-5p	1609.18	3737.52	1.21576	0.542017
hsa-miR-892c-3p	0.375114	47.7739	6.99275	0.542017
hsa-miR-5588-5p	51.0041	31.8116	-0.681061	0.542017
hsa-miR-153	0.952643	4.26691	2.16319	0.542017
hsa-sno-U26	714.638	1455.65	1.02638	0.548777
hsa-miR-1286	0.201744	1.51241	2.90625	0.548777
hsa-miR-4787-3p	0	0.702956	Inf	0.553328
hsa-miR-425-3p	96.6547	66.1365	-0.547394	0.559472
hsa-miR-374c-3p	0	0.616263	Inf	0.563397
hsa-miR-548ab	0.654254	0	-Inf	0.564977
hsa-miR-4520b-3p	0	0.461535	Inf	0.567479
hsa-miR-24-1-5p	55.1086	41.5914	-0.405992	0.570063
hsa-miR-194-3p	217.017	45.8572	-2.24259	0.570476
hsa-miR-99b-5p	30111.2	13392.2	-1.16891	0.572076
hsa-miR-888-5p	4.57788	428.706	6.54917	0.572375
hsa-miR-5706	0	1.04569	Inf	0.573659
hsa-sno-HBII-296A	19.0214	28.787	0.597793	0.580367
hsa-miR-214-3p	2379.63	949.924	-1.32486	0.580426
hsa-miR-511	6.54808	10.271	0.649433	0.581653
hsa-sno-HBII-52-34	23.3099	15.4021	-0.597822	0.583077
hsa-sno-HBII-85-3	135.554	84.167	-0.687544	0.583944
hsa-sno-HBII-85-9	135.554	84.167	-0.687544	0.583944
hsa-sno-U15B	148.962	255.422	0.777945	0.583944
hsa-tRNA-Glu-GAG_	16012.2	20941.4	0.387184	0.583944
hsa-sno-U25	315.062	779.412	1.30675	0.583944
hsa-miR-3138	0.604757	1.61634	1.4183	0.583944
hsa-miR-1295b-3p	1.15115	0.194462	-2.56551	0.587551
hsa-let-7b-3p	182.188	105.517	-0.787948	0.593314
hsa-miR-1262	32.9879	12.8274	-1.36271	0.593314
hsa-miR-6087	3695.41	5452.76	0.561252	0.593978
hsa-sno-HBII-52-42	21.991	15.2887	-0.524449	0.593978
hsa-miR-30a-3p	34470.2	15296.7	-1.17213	0.593978
hsa-sno-ACA62	24.2236	48.2783	0.994964	0.594971
hsa-miR-1289	0.133045	0.913234	2.77907	0.595721
hsa-miR-219-1-3p	4.18772	2.30534	-0.861187	0.601312
hsa-miR-499b-5p	0	0.612515	Inf	0.601317
hsa-miR-223-3p	125.187	188.076	0.587227	0.604715
hsa-let-7g-3p	5.93191	3.39051	-0.806996	0.604915
hsa-miR-1299	15.0424	5.87404	-1.35661	0.611285
hsa-miR-4425	0	0.774072	Inf	0.616051
hsa-sno-mgh28S-2409	50.8917	95.1824	0.903265	0.616051
hsa-miR-539-3p	11.8483	63.5072	2.42224	0.616231
hsa-miR-550a-3p	3.57432	9.60607	1.42628	0.616231
hsa-miR-431-5p	0	0.862861	Inf	0.617018
hsa-let-7a-3p	63.255	84.948	0.425402	0.619129
hsa-miR-181b-3p	13.2695	28.8599	1.12096	0.619129
hsa-miR-149-5p	145.335	64.6203	-1.16932	0.619129
hsa-miR-1252	4.55074	0	-Inf	0.619129
hsa-miR-665	0.54569	3.67777	2.75268	0.620474
hsa-sno-HBI-100	424.983	248.001	-0.777057	0.621703
hsa-miR-130b-5p	5.00989	11.5038	1.19926	0.622019
hsa-miR-378f	55.5697	24.4661	-1.18351	0.622019
hsa-miR-1256	0.267936	1.072	2.00034	0.622019
hsa-miR-1537	0.578522	2.62709	2.18302	0.622019
hsa-miR-34c-3p	0.953259	4.93292	2.3715	0.623571
hsa-miR-4773	0.403487	2.85853	2.82468	0.62695
hsa-miR-1307-3p	458.382	260.245	-0.816677	0.62754
hsa-sno-HBII-52-31	0.087021	0.74166	3.09132	0.62754
hsa-sno-HBII-52-23	0	0.651245	Inf	0.62754
hsa-miR-1255a	22.511	57.7973	1.36037	0.628151
hsa-sno-HBII-55	220.668	477.359	1.1132	0.629023
hsa-miR-199b-5p	99.7602	51.003	-0.967881	0.629023
hsa-sno-HBII-85-8	134.553	87.1116	-0.627237	0.629023
hsa-miR-146b-5p	35476.7	53662.1	0.597029	0.629023
hsa-miR-3664-3p	13.1108	41.1232	1.6492	0.629023
hsa-miR-628-5p	222.879	153.88	-0.534458	0.629023
hsa-sno-HBI-61	144.924	221.726	0.613486	0.629555
hsa-miR-3687	81.1855	125.697	0.630654	0.629555
hsa-miR-551a	0.802622	0	-Inf	0.629555
hsa-tRNA-Asp-GAY	2822.56	6285.2	1.15495	0.629929
hsa-miR-641	31.6798	66.4351	1.06838	0.632761
hsa-miR-212-3p	54.1621	21.3623	-1.34221	0.632761
hsa-miR-654-5p	2.38022	4.63429	0.961253	0.632761
hsa-miR-548al	3.60314	6.82142	0.920819	0.632761
hsa-miR-5584-5p	0	0.499776	Inf	0.632761
hsa-miR-146b-3p	62.4145	110.584	0.825195	0.632761
hsa-miR-1244	1.85178	3.80714	1.0398	0.632761
hsa-miR-92b-5p	114.329	208.738	0.868499	0.632761
hsa-miR-449b-5p	1.18494	3.11663	1.39517	0.637186
hsa-miR-424-5p	17488.7	9737.09	-0.844858	0.637186
hsa-sno-U87	48.418	78.1898	0.691438	0.637186
hsa-sno-U23	33.4279	51.5759	0.625646	0.637186
hsa-miR-1277-3p	26.0491	167.982	2.689	0.63843
hsa-sno-HBII-95B	7.25798	14.03	0.950874	0.63843
hsa-miR-1247-3p	6.92216	2.58354	-1.42187	0.63843
hsa-miR-3944-3p	0.564364	0	-Inf	0.638442
hsa-sno-U62B	1475.47	2162	0.551193	0.638442
hsa-miR-6513-5p	3.35061	1.18318	-1.50175	0.638442
hsa-miR-576-5p	11.1076	20.0265	0.850363	0.638902
hsa-miR-4420	0	0.862523	Inf	0.638902
hsa-sno-U62A	1474.55	2158.82	0.549973	0.638902
hsa-miR-4674	0	0.748323	Inf	0.638902
hsa-miR-4709-3p	3.734	1.86775	-0.999424	0.638969
hsa-miR-3913-5p	6.92776	11.3587	0.713336	0.638969
hsa-miR-4700-5p	0.201744	1.6294	3.01374	0.638969
hsa-miR-944	1.98106	4.90395	1.30767	0.638969
hsa-miR-1323	0.809349	3.6715	2.18154	0.639784
hsa-miR-4645-5p	0	0.709682	Inf	0.640434
hsa-miR-125b-5p	14457	10282.5	-0.491568	0.640434
hsa-sno-ACA1	17.7798	34.0194	0.93612	0.640434
hsa-sno-ACA6	8.36258	13.4243	0.682825	0.640434
hsa-sno-U99	30.2783	41.6167	0.458878	0.640434
hsa-miR-4766-5p	0	0.554014	Inf	0.640434
hsa-sno-U22	558.964	757.672	0.438819	0.640434
hsa-miR-182-5p	1966.02	27822.3	3.82289	0.640644
hsa-sno-HBII-276	573.507	1362.74	1.24863	0.645765
hsa-miR-654-3p	25.9757	14.8408	-0.807593	0.646664
hsa-miR-96-5p	47.9958	629.595	3.71344	0.647484
hsa-let-7i-3p	14.0646	21.9225	0.640347	0.651392
hsa-miR-4635	2.0418	6.74787	1.72459	0.653364
hsa-miR-382-5p	65.2432	134.779	1.0467	0.653364
hsa-sno-U36B	22.8007	42.8347	0.909701	0.653364
hsa-miR-483-5p	371.515	23.0974	-4.00762	0.653364
hsa-miR-891a	62.5635	2614.69	5.38518	0.653364
hsa-sno-ACA36B	711.221	549.498	-0.372185	0.653364
hsa-miR-20b-3p	149.205	23.2722	-2.68061	0.653364
hsa-miR-487a	3.36603	10.3926	1.62644	0.653364
hsa-sno-HBII-85-16	69.5355	45.4328	-0.614014	0.657878
hsa-miR-4426	1.31819	3.14917	1.25641	0.657878
hsa-miR-4785	0.46968	1.10906	1.23958	0.658983
hsa-miR-1295a	0.174499	1.04658	2.58439	0.659727
hsa-miR-4510	86.8065	57.6911	-0.589454	0.659727
hsa-sno-ACA65	0.551814	2.04019	1.88645	0.659727
hsa-sno-HBII-234	8.29583	19.5819	1.23907	0.659727
hsa-miR-1255b-5p	0	0.635584	Inf	0.659727
hsa-sno-ACA27	0.770902	0.224818	-1.77779	0.659727
hsa-sno-ACA2a	24.3375	38.5538	0.663694	0.659727
hsa-tRNA-Glu-GAA	503.455	707.817	0.491512	0.659727
hsa-miR-3129-5p	1.81738	4.30981	1.24576	0.659727
hsa-miR-487b	94.0721	45.1833	-1.05798	0.659727
hsa-miR-3916	5.19946	9.40767	0.855476	0.659727
hsa-miR-3173-3p	0.366961	1.67857	2.19354	0.659727
hsa-miR-4754	0	0.521083	Inf	0.660145
hsa-miR-2114-5p	2.59209	7.55788	1.54387	0.662584
hsa-miR-202-5p	4.64023	38.5328	3.05382	0.665624
hsa-miR-3929	0	1.99644	Inf	0.665934
hsa-miR-1827	5.27212	10.653	1.0148	0.665934
hsa-miR-6721-5p	6.1463	3.29841	-0.897945	0.665934
hsa-sno-SNORA38B	7.86846	14.2893	0.860786	0.665934
hsa-miR-4671-5p	0	0.407683	Inf	0.665934
hsa-sno-HBII-85-24	236.796	163.232	-0.536726	0.665934
hsa-miR-576-3p	4.26281	7.14605	0.74534	0.665934
hsa-miR-3938	0.417201	0	-Inf	0.665934
hsa-miR-891b	0.174499	9.10513	5.70539	0.665934
hsa-sno-U27	2366.98	5490.85	1.21398	0.665934
hsa-miR-4670-5p	0	0.333534	Inf	0.665934
hsa-miR-3133	0	0.352854	Inf	0.665934
hsa-sno-ACA18	127.124	194.49	0.613465	0.66662
hsa-miR-4662a-3p	6.19101	1.87297	-1.72485	0.666795
hsa-let-7d-3p	189.691	146.002	-0.377657	0.667606
hsa-sno-U105B	34.2429	49.5959	0.534415	0.673353
hsa-let-7c	98655.7	66873.7	-0.560964	0.675318
hsa-sno-U46	186.959	413.707	1.14589	0.679967
hsa-miR-4772-5p	1.02234	4.12032	2.01088	0.680219
hsa-miR-490-3p	0.201744	4.17072	4.3697	0.680219
hsa-sno-ACA13	8.77413	12.6344	0.526028	0.681008
hsa-miR-574-5p	0.187557	0.970097	2.3708	0.683715
hsa-miR-516b-5p	0	0.675198	Inf	0.683715
hsa-sno-HBII-85-29	31.056	21.8546	-0.506932	0.683715
hsa-miR-892b	1.23939	39.7928	5.0048	0.683715
hsa-sno-ACA3	53.8498	96.3363	0.839139	0.68396
hsa-miR-143-5p	2720.04	9722.83	1.83775	0.684772
hsa-miR-1304-3p	4.74926	7.39933	0.639692	0.684772
hsa-sno-mgU6-47	85.6672	127.098	0.569124	0.685954
hsa-miR-4532	33.1127	21.6465	-0.613252	0.685954
hsa-miR-185-5p	8656.37	21837.2	1.33495	0.685954
hsa-miR-4482-3p	0	0.57095	Inf	0.685954
hsa-miR-4791	2.31461	4.32544	0.902077	0.685954
hsa-miR-5697	0.234207	1.12745	2.26721	0.685954
hsa-miR-3654	0.0780689	0.494484	2.66311	0.685954
hsa-miR-629-3p	2.11825	7.90045	1.89907	0.685954
hsa-miR-3616-3p	0.568705	0	-Inf	0.685954
hsa-miR-1254	1.92457	4.00313	1.05659	0.685954
hsa-sno-U105	145.279	267.257	0.879405	0.685983
hsa-miR-1226-3p	0.475649	0	-Inf	0.688217
hsa-sno-U61	178.906	285.372	0.673642	0.688217
hsa-miR-338-5p	61.0255	31.2347	-0.966262	0.688217
hsa-miR-2355-3p	8.01983	16.033	0.999402	0.688217
hsa-sno-U45C	98.5985	152.337	0.627629	0.690781
hsa-miR-208a	3.10251	0	-Inf	0.690781
hsa-miR-658	0	0.64051	Inf	0.690781
hsa-miR-4769-5p	0.269783	1.12741	2.06314	0.690781
hsa-scr-HY4	10805.3	16887.4	0.644205	0.690781
hsa-sno-HBII-52-15	25.1327	18.1938	-0.466123	0.690781
hsa-miR-3179	3.20217	8.07282	1.33402	0.690781
hsa-miR-4781-3p	3.57234	1.0555	-1.75895	0.690781
hsa-sno-ACA60	26.3232	18.6168	-0.499731	0.690781
hsa-miR-222-5p	4.78956	57.3851	3.58271	0.690781
hsa-miR-3160-3p	0.269783	1.12625	2.06165	0.690781
hsa-miR-890	5.20387	132.193	4.66692	0.690781
hsa-sno-U86	0	0.671527	Inf	0.690781
hsa-miR-216a-5p	201.102	54.249	-1.89026	0.690781
hsa-miR-190b	5.04896	10.1553	1.00817	0.690781
hsa-miR-200b-3p	8891.01	5211.7	-0.770593	0.690781
hsa-miR-5088	0	0.503129	Inf	0.690781
hsa-sno-U59B	75.5183	115.812	0.616881	0.690781
hsa-miR-6501-3p	0	0.521045	Inf	0.690781
hsa-sno-HBII-52-48	0.269783	0.909969	1.75402	0.690781
hsa-sno-U107	53.7307	33.2562	-0.692124	0.690781
hsa-miR-92b-3p	2148.53	3565.78	0.730865	0.690781
hsa-miR-4745-3p	0	0.451253	Inf	0.690781
hsa-sno-U64	14.6965	23.0798	0.651157	0.690781
hsa-rRNA-SSU-rRNA_Hsa	1.36524e+06	1.65073e+06	0.273954	0.690781
hsa-sno-HBII-85-21	62.7492	40.0872	-0.646455	0.690781
hsa-miR-3150b-3p	0.375786	0	-Inf	0.690781
hsa-sno-HBII-438A	1.89224	3.32767	0.814416	0.690781
hsa-sno-HBII-438B	1.89224	3.32767	0.814416	0.690781
hsa-miR-668	0	0.484203	Inf	0.690781
hsa-miR-383	1.14531	0	-Inf	0.690781
hsa-miR-4642	0	0.472112	Inf	0.690781
hsa-miR-3190-5p	0	0.728903	Inf	0.690781
hsa-miR-3942-5p	3.96891	7.26561	0.872342	0.690781
hsa-miR-3910	2.02337	6.4391	1.6701	0.690781
hsa-miR-3609	23.9317	35.1489	0.554558	0.690781
hsa-miR-888-3p	0	1.91095	Inf	0.691352
hsa-sno-HBII-85-1	152.211	96.6277	-0.655562	0.692277
hsa-miR-346	0.564364	2.52185	2.15978	0.694613
hsa-miR-155-3p	0.211949	5.63631	4.73296	0.696249
hsa-sno-ACA56	0.425921	1.04123	1.28963	0.697241
hsa-sno-ACA58	97.8595	202.229	1.04721	0.697241
hsa-miR-3124-5p	1.8576	4.40932	1.24711	0.697241
hsa-miR-3936	5.4902	15.4094	1.48888	0.697241
hsa-miR-450b-5p	156.245	206.924	0.405294	0.697241
hsa-miR-4429	1.32259	3.08848	1.22353	0.697241
hsa-sno-ACA7	171.721	313.882	0.870159	0.697241
hsa-miR-3144-3p	0.443825	4.14568	3.22355	0.697241
hsa-miR-4516	155.788	127.023	-0.294494	0.697241
hsa-miR-4743-5p	0.269783	1.75316	2.70008	0.697241
hsa-miR-3151	0	1.30202	Inf	0.697241
hsa-miR-4762-3p	0.301607	1.11245	1.883	0.697241
hsa-miR-483-3p	5.64823	0.269986	-4.38684	0.697241
hsa-miR-4515	0.269783	2.436	3.17464	0.697241
hsa-miR-4428	0.156138	1.2044	2.94742	0.697241
hsa-sno-HBII-296B	30.7422	42.663	0.472767	0.697241
hsa-sno-HBII-85-18	62.8756	40.2439	-0.64373	0.697241
hsa-miR-2355-5p	12.0997	20.7093	0.775311	0.697241
hsa-miR-183-5p	1815.83	11212.8	2.62645	0.697241
hsa-miR-486-3p	5.65246	20.1411	1.83319	0.697241
hsa-miR-4306	5.84613	14.7996	1.34001	0.697241
hsa-tRNA-Met-i	4584.87	2685.46	-0.771711	0.697241
hsa-miR-552	0	0.286343	Inf	0.697241
hsa-miR-133b	1.52835	0.539467	-1.50237	0.697241
hsa-sno-E3	67.8704	88.8019	0.387809	0.697241
hsa-sno-E2	13.6842	21.4198	0.646435	0.697241
hsa-miR-940	7.85368	4.00785	-0.970542	0.697241
hsa-sno-U18A	147.85	349.175	1.23982	0.697241
hsa-sno-HBI-115	25.9981	15.4617	-0.749705	0.697241
hsa-tRNA-Leu-CTA_	119.915	170.702	0.509468	0.697241
hsa-miR-376a-3p	50.0346	31.9599	-0.646662	0.699905
hsa-sno-U104	10027.2	20249.2	1.01394	0.702243
hsa-sno-ACA15	0.37187	0.774993	1.05938	0.702379
hsa-miR-151a-5p	873.983	755.524	-0.210128	0.702389
hsa-tRNA-Ile-ATT	343.829	448.987	0.384986	0.702389
hsa-sno-ACA7B	126.961	235.73	0.892757	0.702389
hsa-miR-548i	0.311986	0	-Inf	0.702389
hsa-miR-548f	0	0.280095	Inf	0.702389
hsa-miR-3170	8.42886	20.8026	1.30335	0.702389
hsa-sno-U93	31.7986	36.7319	0.208073	0.702389
hsa-miR-1224-5p	3.5945	6.47612	0.84934	0.702389
hsa-miR-3606-5p	0.403487	5.63207	3.80307	0.702389
hsa-sno-HBII-52-35	0	0.404102	Inf	0.702389
hsa-sno-HBII-210	185.977	289.391	0.637895	0.702389
hsa-sno-U50	297.555	531.496	0.836901	0.702389
hsa-sno-U55	514.029	757.693	0.559763	0.702389
hsa-sno-U52	201.08	329.158	0.711012	0.702389
hsa-miR-5680	1.5833	3.87392	1.29086	0.702389
hsa-sno-HBII-85-13	4.24527	0.502468	-3.07875	0.702389
hsa-miR-221-3p	3197.62	11742.3	1.87665	0.702389
hsa-miR-4661-5p	1.19682	2.659	1.15167	0.702389
hsa-sno-U72	9.26304	15.8338	0.773447	0.702389
hsa-miR-301b	0.747763	2.22393	1.57246	0.702389
hsa-sno-U42A	173.889	242.229	0.478205	0.702389
hsa-tRNA-Leu-TTA	2286.9	1363.37	-0.746223	0.702389
hsa-miR-372	8.14357	42.7833	2.39332	0.702389
hsa-sno-HBII-85-23	59.1749	37.1234	-0.672657	0.702389
hsa-miR-1250	1.49433	4.19051	1.48763	0.702389
hsa-sno-U71a	1.41187	2.9655	1.07067	0.702389
hsa-miR-150-5p	680.97	1434.95	1.07533	0.702389
hsa-miR-26b-5p	11070.4	9422.6	-0.232511	0.702389
hsa-miR-1271-3p	0	0.295604	Inf	0.702389
hsa-miR-548av-5p	0.373717	0	-Inf	0.702389
hsa-miR-330-3p	266.462	347.755	0.384144	0.703877
hsa-miR-1263	6.75504	1.4474	-2.2225	0.705812
hsa-tRNA-Glu-GAG	258.719	329.704	0.349786	0.706938
hsa-miR-4667-5p	0.422227	0	-Inf	0.709032
hsa-miR-4427	0	1.93287	Inf	0.709032
hsa-miR-6130	4.5118	6.33044	0.488601	0.709032
hsa-miR-221-5p	3266.97	13067.7	1.99998	0.709032
hsa-miR-3940-3p	0.422227	0	-Inf	0.709032
hsa-miR-582-5p	19.681	37.046	0.912517	0.709032
hsa-miR-181b-5p	2564.26	3643.28	0.506699	0.709032
hsa-sno-ACA35	18.6351	23.6867	0.346055	0.709032
hsa-miR-1273c	4.72277	9.21215	0.963904	0.709032
hsa-sno-ACA54	83.9605	54.2671	-0.629633	0.709032
hsa-sno-ACA10	36.0647	62.7894	0.799932	0.710454
hsa-miR-4724-5p	2.29226	4.32791	0.916899	0.710454
hsa-miR-378c	1119.89	793.845	-0.496434	0.710454
hsa-miR-3656	23.6747	37.3282	0.656916	0.710454
hsa-miR-26b-3p	13.9156	8.47585	-0.715273	0.710454
hsa-miR-127-3p	1474.87	1039.88	-0.504175	0.710454
hsa-miR-1249	2.07869	4.07383	0.970714	0.712984
hsa-miR-193a-3p	454.704	835.114	0.877046	0.712984
hsa-miR-4691-3p	0.54569	0	-Inf	0.712984
hsa-sno-HBII-85-2	136.687	90.5154	-0.594645	0.712984
hsa-sno-HBII-85-6	138.792	93.5601	-0.568955	0.712984
hsa-miR-193a-5p	261.407	376.496	0.526337	0.712984
hsa-sno-U73a	43.8587	58.0925	0.405489	0.712984
hsa-miR-30d-3p	49.2808	26.0955	-0.917222	0.712984
hsa-miR-943	0.432044	0	-Inf	0.712984
hsa-miR-31-3p	16.2981	36.76	1.17343	0.712984
hsa-miR-5000-3p	0.952628	0.224818	-2.08315	0.712984
hsa-miR-655	13.2759	32.75	1.30268	0.717511
hsa-miR-3144-5p	8.11493	74.3981	3.19662	0.717926
hsa-sno-HBII-316	18.8977	44.0785	1.22186	0.717926
hsa-miR-5701	5.91751	2.29574	-1.36603	0.718286
hsa-miR-29a-5p	63.474	100.609	0.664518	0.727624
hsa-miR-548ag	1.04612	0.451253	-1.21304	0.727679
hsa-sno-U85	131.294	176.418	0.4262	0.72794
hsa-miR-504	142.223	313.975	1.14249	0.730992
hsa-miR-455-5p	560.207	460.24	-0.283573	0.731728
hsa-miR-3120-3p	3.55282	8.56881	1.27013	0.731728
hsa-sno-14q(II-20)	1.42162	14.6426	3.36456	0.731728
hsa-sno-U8	766.559	1116.68	0.542745	0.731728
hsa-miR-548az-5p	0.553718	1.65429	1.57899	0.731728
hsa-miR-5683	6.96718	19.2217	1.46409	0.733079
hsa-miR-1270	175.022	265.531	0.601343	0.733079
hsa-miR-616-3p	1.12787	3.33002	1.56193	0.733079
hsa-sno-U79	45.1657	82.2425	0.864657	0.73374
hsa-miR-5006-3p	0.34877	0	-Inf	0.736633
hsa-miR-6511a-5p	0.423656	1.10395	1.3817	0.737925
hsa-miR-1248	33.4325	49.8114	0.575228	0.737925
hsa-miR-148b-3p	24339.3	17219.3	-0.499263	0.738588
hsa-miR-651	6.58519	34.4802	2.38847	0.738588
hsa-miR-3684	0.174499	0.581286	1.73603	0.738588
hsa-sno-HBII-108	0	0.875079	Inf	0.738588
hsa-sno-HBII-142	3402.27	5121.15	0.589969	0.738588
hsa-miR-3163	1.14007	0.338219	-1.75309	0.739543
hsa-miR-3152-5p	0.174042	2.21783	3.67164	0.739543
hsa-sno-ACA41	3.07356	2.25869	-0.444429	0.745763
hsa-miR-23a-3p	20665.9	31695.7	0.617037	0.745763
hsa-miR-340-5p	514.109	976.495	0.925538	0.745763
hsa-sno-ACA49	21.5088	36.9743	0.781594	0.746383
hsa-miR-543	18.9929	39.2032	1.04551	0.746911
hsa-sno-U29	219.86	298.776	0.442479	0.748107
hsa-miR-3690	20.7731	72.5693	1.80465	0.748183
hsa-sno-U73b	0.275371	0	-Inf	0.748259
hsa-miR-101-3p	220186	343125	0.64001	0.748259
hsa-miR-452-5p	768.927	3190.96	2.05307	0.74826
hsa-sno-U45B	27.5623	36.0307	0.386534	0.753208
hsa-sno-U83	80.4565	129.605	0.687842	0.753208
hsa-miR-147b	1.32137	2.9014	1.13471	0.753208
hsa-miR-625-3p	61.6824	135.08	1.13088	0.753689
hsa-miR-489	267.024	753.29	1.49624	0.754122
hsa-miR-3610	1.78949	6.85611	1.93784	0.754122
hsa-sno-U67	0.967543	1.94146	1.00474	0.755057
hsa-miR-561-5p	16.1838	45.1618	1.48055	0.757232
hsa-sno-HBII-52-14	7.77984	5.34708	-0.540989	0.757232
hsa-miR-3130-3p	12.8447	23.3119	0.859891	0.758772
hsa-sno-SNORD123	133.666	253.518	0.923455	0.762264
hsa-sno-HBII-108B	18.9983	32.1296	0.758032	0.762264
hsa-sno-ACA33	17.8782	24.2879	0.442032	0.762986
hsa-miR-758-3p	0.317924	1.94199	2.61079	0.762986
hsa-sno-HBII-52-2	0.243387	1.04252	2.09875	0.763738
hsa-miR-23b-3p	21855.7	14191.2	-0.623014	0.763857
hsa-sno-HBII-85-12	5.84931	0.518159	-3.4968	0.763857
hsa-sno-HBII-52-16	5.61344	3.63197	-0.628131	0.766962
hsa-sno-HBII-52-1	5.61344	3.63197	-0.628131	0.766962
hsa-sno-ACA3-2	40.351	59.9214	0.570468	0.769025
hsa-miR-1297	3.26224	1.29401	-1.33401	0.769965
hsa-tRNA-Val-GTY	20811.1	28099	0.43317	0.771357
hsa-tRNA-Arg-CGA_	929.783	1445.3	0.636407	0.771357
hsa-miR-4777-3p	0	0.391683	Inf	0.771357
hsa-miR-1468	23.1265	14.3085	-0.692671	0.771357
hsa-sno-mgU6-53	185.692	138.505	-0.422975	0.772174
hsa-sno-14q(II-25)	4.01653	24.7114	2.62115	0.776071
hsa-miR-181c-5p	164.078	218.345	0.412225	0.776283
hsa-miR-6501-5p	0.551814	1.25179	1.18173	0.77852
hsa-miR-152	10639.4	14371.3	0.433774	0.781943
hsa-miR-3688-3p	0.820603	1.85105	1.17359	0.783409
hsa-tRNA-Ser-TCY	6331.15	7933.83	0.32555	0.786092
hsa-miR-29c-3p	22133.8	13905.4	-0.670609	0.786092
hsa-miR-3653	89.9991	154.825	0.78266	0.787131
hsa-miR-105-5p	0.696168	0	-Inf	0.787131
hsa-miR-653	54.8056	40.9722	-0.419676	0.79082
hsa-tRNA-Val-GTG	29869.6	41250.5	0.46573	0.791868
hsa-miR-4707-5p	0	0.52081	Inf	0.793127
hsa-miR-632	0.201072	0.785166	1.96529	0.793358
hsa-miR-128	4474.18	8499.12	0.925691	0.794005
hsa-miR-369-3p	50.447	120.335	1.25422	0.794005
hsa-miR-769-5p	191.801	152.036	-0.335203	0.794005
hsa-miR-493-5p	34.616	80.7838	1.22263	0.794005
hsa-miR-676-5p	1.99911	4.03359	1.01271	0.794005
hsa-miR-337-5p	13.6228	7.26672	-0.906641	0.795028
hsa-tRNA-Arg-CGY_	754.3	1124.01	0.575447	0.797818
hsa-sno-U48	125.106	81.4797	-0.618633	0.798107
hsa-miR-4782-5p	0	1.04078	Inf	0.802927
hsa-tRNA-Phe-TTY	472.739	1534.22	1.69839	0.803256
hsa-miR-5010-5p	22.4169	31.8248	0.505563	0.803256
hsa-miR-215	3332.74	5174.25	0.634643	0.803256
hsa-miR-769-3p	2.45088	1.22055	-1.00577	0.803256
hsa-sno-14q(II-5)	2.16417	14.598	2.75389	0.806923
hsa-sno-ACA67B	5.48772	7.80281	0.507787	0.806923
hsa-tRNA-Arg-AGG	4180.15	3329.54	-0.328234	0.806923
hsa-miR-4668-3p	0.100872	0.815262	3.01474	0.806923
hsa-miR-4466	0	0.410105	Inf	0.806923
hsa-sno-ACA25	11.9036	17.9812	0.595092	0.812881
hsa-miR-561-3p	0	0.674454	Inf	0.812881
hsa-tRNA-Pro-CCA	2763.56	1966.16	-0.49115	0.812881
hsa-sno-SNORD125	94.9026	157.001	0.726259	0.814235
hsa-miR-4727-3p	0.301943	0.748205	1.30916	0.814235
hsa-miR-151b	111.13	89.7104	-0.308899	0.814573
hsa-miR-4526	0.977073	3.16302	1.69476	0.816242
hsa-sno-ACA51	21.8531	26.5054	0.278445	0.816242
hsa-sno-SNORA11B	4.21657	2.26824	-0.894495	0.816242
hsa-miR-361-5p	1036.97	835.654	-0.311391	0.816242
hsa-miR-98-5p	1568.04	1242.46	-0.335754	0.816419
hsa-miR-539-5p	1.58423	2.63714	0.735195	0.816419
hsa-miR-4690-3p	1.69199	3.34435	0.983008	0.816419
hsa-miR-580	0.7432	2.11531	1.50904	0.81715
hsa-miR-19a-3p	41.416	94.0891	1.18384	0.81715
hsa-tRNA-Gly-GGA	4502.88	6697.94	0.57287	0.818029
hsa-sno-ACA59	1.12986	3.2128	1.50768	0.818188
hsa-sno-ACA59B	1.12986	3.2128	1.50768	0.818188
hsa-miR-671-5p	104.99	173.321	0.723195	0.818468
hsa-miR-892a	9.54361	60.4761	2.66376	0.818627
hsa-sno-U68	1.12198	1.98568	0.82358	0.819492
hsa-miR-4680-5p	1.14871	0.487139	-1.23761	0.820246
hsa-miR-329	4.84551	8.53163	0.816173	0.820399
hsa-miR-4658	0	0.892096	Inf	0.820399
hsa-miR-374b-5p	3036.73	4193.36	0.465587	0.820399
hsa-miR-199a-3p	59999	38456.8	-0.641702	0.820399
hsa-miR-199b-3p	29926.4	19200.4	-0.640285	0.820642
hsa-miR-6504-5p	0	0.486155	Inf	0.823377
hsa-miR-6716-3p	6.95826	5.2355	-0.410397	0.828892
hsa-miR-548l	1.08292	3.37062	1.63809	0.828892
hsa-miR-31-5p	2786.73	4768.92	0.77509	0.830268
hsa-sno-ACA46	123.878	173.896	0.489307	0.830303
hsa-sno-HBII-52-20	3.79786	2.78019	-0.450004	0.830303
hsa-sno-U35B	14.4419	23.7694	0.718845	0.830303
hsa-miR-205-5p	13.3898	4.87889	-1.45651	0.830753
hsa-miR-423-5p	4539.2	5700.04	0.328533	0.830753
hsa-miR-4524a-5p	1.30322	0.365729	-1.83323	0.830753
hsa-miR-4671-3p	0	0.562045	Inf	0.830753
hsa-miR-29b-3p	4136.19	5037.57	0.284426	0.830753
hsa-sno-14q(II-28)	5.03203	21.8615	2.11918	0.830753
hsa-miR-1269a	289.955	1411.95	2.28379	0.830753
hsa-miR-10a-3p	134.292	91.8596	-0.547869	0.830753
hsa-miR-892c-5p	0	0.562045	Inf	0.830753
hsa-sno-14q(I-5)	0.390344	4.72178	3.59651	0.830753
hsa-sno-ACA42	148.45	58.5161	-1.34307	0.830753
hsa-sno-14q(II-29)	0.523068	2.56906	2.29617	0.831735
hsa-let-7a-5p	401317	487243	0.279897	0.831735
hsa-sno-14q(II-13)	0.211949	2.09857	3.30762	0.832649
hsa-miR-495-3p	162.782	286.621	0.816198	0.833153
hsa-miR-4716-3p	0.370655	0	-Inf	0.833153
hsa-sno-U14B	12.0594	16.0673	0.413966	0.833153
hsa-miR-3195	0.412988	0.0914322	-2.17533	0.833153
hsa-miR-4423-3p	3.46293	1.06604	-1.69973	0.833153
hsa-miR-331-5p	9.01073	14.157	0.651797	0.833153
hsa-tRNA-Ala-GCY	5030.38	6116.78	0.282103	0.83476
hsa-miR-409-3p	95.6912	153.367	0.680527	0.836792
hsa-miR-766-5p	13.0051	19.964	0.618325	0.836792
hsa-miR-1185-2-3p	1.50872	0.498839	-1.59668	0.838444
hsa-miR-642b-3p	0.336635	0.936842	1.47662	0.839566
hsa-miR-4454	49.5772	74.2845	0.583383	0.839731
hsa-miR-22-3p	9983.44	12427.4	0.315917	0.840829
hsa-miR-5187-5p	9.96076	6.87273	-0.535373	0.841223
hsa-miR-6509-5p	0.100872	0.650499	2.68902	0.841674
hsa-miR-331-3p	268.947	383.274	0.511056	0.841698
hsa-let-7g-5p	35300.2	49656	0.49229	0.844624
hsa-miR-758-5p	3.38316	7.0218	1.05347	0.844624
hsa-miR-4457	0	0.743413	Inf	0.845418
hsa-sno-U24	425.842	493.673	0.213235	0.845418
hsa-sno-HBII-52-10	9.2335	6.70488	-0.461665	0.847308
hsa-miR-3135a	0	0.365729	Inf	0.847308
hsa-miR-4803	0	0.365729	Inf	0.847308
hsa-sno-SNORD127	107.724	91.2855	-0.238886	0.847688
hsa-miR-744-3p	1.97357	1.17987	-0.742179	0.848612
hsa-sno-U98b	0	0.251564	Inf	0.849707
hsa-miR-4746-5p	0	0.388924	Inf	0.849707
hsa-miR-365b-5p	62.7907	87.2106	0.473952	0.849707
hsa-miR-371a-5p	44.7358	134.011	1.58285	0.849707
hsa-miR-545-3p	0	0.388924	Inf	0.849707
hsa-sno-ACA17	8.5105	11.8042	0.471985	0.849707
hsa-miR-642b-5p	0	0.217962	Inf	0.849707
hsa-miR-4795-3p	0	0.20964	Inf	0.849707
hsa-sno-U59A	412.931	710.118	0.782159	0.849707
hsa-tRNA-Tyr-TAT	0.37882	0.814088	1.10367	0.849707
hsa-miR-545-5p	0	0.388924	Inf	0.849707
hsa-miR-629-5p	580.569	1238.12	1.09261	0.853942
hsa-miR-4531	1.94359	0.99149	-0.971057	0.853942
hsa-sno-U100	0.888565	1.93621	1.12368	0.853942
hsa-miR-556-3p	6.05671	3.83873	-0.657906	0.853942
hsa-miR-10a-5p	161822	105891	-0.611821	0.853942
hsa-miR-375	25.3409	31.9284	0.333371	0.853942
hsa-miR-191-5p	40504	31980.4	-0.340874	0.853942
hsa-miR-148a-5p	145.731	193.292	0.407473	0.853942
hsa-sno-U21	2021.68	2938.26	0.539411	0.853942
hsa-sno-14q(II-22)	7.55603	31.9752	2.08125	0.854489
hsa-miR-5590-5p	1.8127	3.65961	1.01355	0.854489
hsa-miR-4688	0.550931	1.42884	1.3749	0.854489
hsa-miR-3128	0.269783	0.609528	1.17589	0.856178
hsa-miR-3681-5p	0	0.450958	Inf	0.857385
hsa-miR-452-3p	8.7565	29.3107	1.743	0.857385
hsa-miR-99b-3p	223.594	164.874	-0.439515	0.857385
hsa-miR-505-5p	105.627	184.16	0.801986	0.857385
hsa-miR-1469	11.0611	1.36123	-3.02251	0.857385
hsa-miR-424-3p	926.252	1340.49	0.533286	0.859769
hsa-miR-196a-5p	9261.09	5669.1	-0.708061	0.860525
hsa-miR-4798-5p	0.368087	0.964079	1.38911	0.860632
hsa-tRNA-Ser-TCA_	1920.6	2399.14	0.320962	0.860632
hsa-miR-27b-3p	29548.1	24037.7	-0.297766	0.860632
hsa-miR-4448	0	0.278044	Inf	0.860632
hsa-miR-3121-3p	3.13705	4.92346	0.650265	0.860632
hsa-miR-585	69.1916	140.314	1.01999	0.860632
hsa-tRNA-Leu-CTG	17854.2	21322.4	0.256104	0.860632
hsa-miR-4699-3p	0.404675	1.08214	1.41905	0.860632
hsa-miR-30c-1-3p	91.4338	61.6964	-0.567543	0.861414
hsa-miR-145-5p	4184.81	3470.75	-0.269913	0.861414
hsa-sno-ACA39	0.74374	0.225479	-1.72181	0.861414
hsa-miR-3648	9.56322	12.2722	0.359822	0.861414
hsa-miR-515-5p	0	0.517447	Inf	0.863067
hsa-sno-ACA64	0.502679	1.16321	1.2104	0.863067
hsa-miR-181c-3p	61.2036	96.6826	0.65964	0.863067
hsa-miR-4465	0	0.517447	Inf	0.863067
hsa-miR-3651	0.720189	0.224818	-1.67962	0.863067
hsa-miR-3164	3.77806	7.33203	0.956568	0.863205
hsa-sno-U94	688.809	819.659	0.250921	0.863205
hsa-tRNA-Arg-CGG	2317.07	4022.58	0.79582	0.863205
hsa-miR-141-3p	1408.91	6585.87	2.22479	0.863205
hsa-miR-624-5p	5.30128	6.6216	0.320837	0.863205
hsa-miR-3652	0.845425	0.338219	-1.32172	0.863205
hsa-miR-493-3p	20.9637	45.7993	1.12743	0.867669
hsa-miR-141-5p	16.9285	74.1258	2.13052	0.867669
hsa-miR-4525	2.15145	4.35576	1.01762	0.870828
hsa-miR-1246	19.5886	30.2621	0.627502	0.871176
hsa-miR-624-3p	0.481732	1.12645	1.22548	0.872331
hsa-miR-185-3p	105.792	189.051	0.837549	0.872331
hsa-sno-ACA20	201.432	339.456	0.752931	0.8728
hsa-sno-snR38C	19.301	24.1181	0.321439	0.872988
hsa-sno-U97	654.134	804.975	0.299358	0.873771
hsa-miR-27a-5p	142.118	188.762	0.409483	0.873771
hsa-miR-450a-5p	122.831	150.391	0.292042	0.874705
hsa-miR-196b-3p	10.4716	14.9007	0.5089	0.87474
hsa-miR-182-3p	0	0.260405	Inf	0.87648
hsa-sno-HBI-6	10.1455	7.55624	-0.425104	0.883226
hsa-miR-149-3p	0.402143	0	-Inf	0.883364
hsa-miR-4744	0	0.274297	Inf	0.887832
hsa-miR-6508-3p	1.38483	0.485223	-1.51298	0.893601
hsa-tRNA-Ser-TCA	1064.1	759.699	-0.486128	0.894574
hsa-miR-181a-3p	168.912	207.844	0.299232	0.894574
hsa-miR-4521	137.219	76.32	-0.846349	0.894574
hsa-tRNA-Thr-ACG	264.783	149.043	-0.829085	0.894574
hsa-sno-U54	27.5156	34.42	0.322997	0.894574
hsa-miR-326	24.6515	17.2172	-0.517822	0.894574
hsa-miR-4772-3p	0	0.291693	Inf	0.894574
hsa-sno-14q(II-3)	8.53847	26.0751	1.61062	0.894574
hsa-miR-6513-3p	0.77023	0.291693	-1.40084	0.894574
hsa-miR-875-5p	0.100872	0.971774	3.2681	0.894574
hsa-miR-27a-3p	12512.3	18796.4	0.587108	0.894574
hsa-miR-202-3p	2.29316	6.2795	1.45331	0.894574
hsa-miR-6515-3p	0.376443	0.740688	0.976437	0.894574
hsa-miR-449a	3.00266	4.2306	0.49462	0.894725
hsa-miR-1271-5p	32.4062	61.7549	0.930283	0.894725
hsa-miR-4734	0.532179	0	-Inf	0.894725
hsa-sno-U84	174.546	235.502	0.432135	0.894725
hsa-miR-548ai	1.10952	2.39355	1.10922	0.894725
hsa-miR-570-5p	1.10952	2.39355	1.10922	0.894725
hsa-miR-4738-3p	0.399134	0.854392	1.09802	0.894725
hsa-miR-625-5p	18.2149	23.4547	0.364762	0.894725
hsa-miR-218-2-3p	1.89495	3.3658	0.828788	0.894725
hsa-sno-14q(II-14)	4.76321	13.8861	1.54364	0.894725
hsa-miR-95	700.946	1142.64	0.704995	0.895559
hsa-miR-454-5p	3.27957	2.59436	-0.338131	0.895796
hsa-miR-146a-5p	5313.35	7074.35	0.412975	0.895796
hsa-sno-HBII-295	2258.36	3500.77	0.632397	0.895796
hsa-sno-14q(I-7)	2.51607	10.78	2.09911	0.897334
hsa-miR-664a-5p	469.995	395.362	-0.249471	0.898907
hsa-miR-4433-3p	0.201744	1.01466	2.33039	0.902433
hsa-tRNA-Arg-AGA	2151.91	2738.42	0.347723	0.902433
hsa-miR-5188	1.60762	1.99681	0.312771	0.902433
hsa-sno-HBII-52-21	6.63345	5.32583	-0.316754	0.902433
hsa-miR-1276	4.88155	3.83888	-0.346654	0.902433
hsa-miR-5089-5p	0	0.338219	Inf	0.902433
hsa-miR-4728-3p	1.20408	0.599339	-1.00649	0.902433
hsa-sno-14q(I-9)	1.5313	4.74758	1.63243	0.902433
hsa-miR-4742-5p	2.54852	1.01333	-1.33055	0.902546
hsa-miR-33b-3p	0.201744	0.872381	2.11243	0.903484
hsa-miR-497-5p	635.433	798.099	0.328828	0.903484
hsa-miR-379-5p	663.025	1741.75	1.3934	0.904263
hsa-sno-HBII-52-17	5.90089	4.60629	-0.357328	0.904263
hsa-sno-HBII-52-18	5.90089	4.60629	-0.357328	0.904263
hsa-sno-HBII-52-19	5.90089	4.60629	-0.357328	0.904263
hsa-sno-ACA4	2.21144	3.40628	0.623212	0.904263
hsa-miR-4737	0.234207	0	-Inf	0.904263
hsa-miR-455-3p	2215.86	1728.48	-0.358361	0.904263
hsa-miR-4417	0.225203	0	-Inf	0.904263
hsa-miR-6128	0.187557	0	-Inf	0.904263
hsa-miR-378j	0.233581	0	-Inf	0.904263
hsa-miR-4749-3p	0.233917	0	-Inf	0.904263
hsa-sno-HBII-95	2.35116	3.36606	0.517686	0.904263
hsa-miR-212-5p	5.76171	4.77783	-0.270142	0.907091
hsa-sno-U3-3	5255.76	4961.87	-0.083014	0.907776
hsa-sno-14q(II-23)	8.03239	23.8878	1.57237	0.908973
hsa-miR-663b	1.47837	2.53533	0.778168	0.913222
hsa-miR-3661	0	0.416475	Inf	0.913668
hsa-miR-409-5p	60.1857	84.0467	0.48177	0.913895
hsa-let-7d-5p	72797.8	100942	0.471556	0.914083
hsa-miR-23a-5p	9.63658	16.0035	0.731793	0.914083
hsa-miR-380-5p	4.41947	11.2539	1.34848	0.914083
hsa-miR-107	12014.3	8197.4	-0.551519	0.914083
hsa-sno-ACA34	191.39	232.462	0.280476	0.914083
hsa-sno-U13	39.7107	48.1088	0.276773	0.914083
hsa-sno-U3	5280.86	4996.39	-0.0798871	0.914083
hsa-miR-3162-5p	0	0.446048	Inf	0.914083
hsa-miR-627	62.3617	95.482	0.614568	0.914083
hsa-miR-3914	0	0.446048	Inf	0.914083
hsa-miR-1284	1.80633	2.58321	0.516102	0.914083
hsa-sno-HBII-239	3795.84	2592.87	-0.549868	0.916644
hsa-sno-U88	11.304	14.241	0.333216	0.917273
hsa-miR-32-5p	289.505	243.329	-0.250677	0.919141
hsa-miR-1302	1.05376	1.55834	0.564459	0.919141
hsa-miR-5090	0.334789	0.746562	1.15701	0.919141
hsa-miR-5002-5p	0.201744	0.554014	1.4574	0.919656
hsa-sno-U32A	171.695	218.053	0.344829	0.922738
hsa-miR-4529-3p	0.400981	0.748022	0.899546	0.922738
hsa-miR-216a-3p	2.72086	1.41343	-0.944858	0.922738
hsa-miR-4497	157.941	132.126	-0.257479	0.922738
hsa-miR-4498	0.201744	0	-Inf	0.922738
hsa-miR-4444	2.69631	4.15672	0.624459	0.922738
hsa-miR-4796-3p	4.9691	4.02592	-0.303665	0.922738
hsa-miR-4523	0.467833	0.779807	0.737122	0.922738
hsa-miR-939-5p	0	0.182864	Inf	0.922738
hsa-miR-4638-5p	0.201072	0	-Inf	0.922738
hsa-miR-4733-5p	0	0.297365	Inf	0.922738
hsa-miR-140-5p	1850.88	1404.85	-0.397799	0.922738
hsa-miR-3920	0	0.27765	Inf	0.922738
hsa-miR-4473	0	0.225479	Inf	0.922738
hsa-miR-3926	0.156138	0.583386	1.90163	0.922738
hsa-miR-4735-5p	0	0.225479	Inf	0.922738
hsa-miR-3161	0.399134	0	-Inf	0.922738
hsa-miR-3200-5p	4.9691	6.95498	0.485061	0.922738
hsa-sno-ACA5c	46.6232	73.0637	0.648108	0.922738
hsa-sno-ACA5b	0	0.225479	Inf	0.922738
hsa-miR-4710	0.404675	0	-Inf	0.922738
hsa-miR-3130-5p	0	0.258724	Inf	0.922738
hsa-sno-ACA50	11.0443	8.75311	-0.335439	0.922738
hsa-miR-579	0	0.194462	Inf	0.922738
hsa-miR-376c-3p	248.308	216.847	-0.195448	0.922738
hsa-miR-18a-5p	74.877	110.611	0.562901	0.922738
hsa-miR-130a-5p	2.52094	1.67339	-0.591183	0.922738
hsa-miR-604	0	0.173603	Inf	0.922738
hsa-miR-4477b	0	0.194462	Inf	0.922738
hsa-miR-609	0	0.182864	Inf	0.922738
hsa-miR-3159	0	0.297365	Inf	0.922738
hsa-miR-573	0	0.173603	Inf	0.922738
hsa-sno-HBII-52-33	31.5846	37.3867	0.243306	0.922738
hsa-rRNA-5S	131332	159937	0.28428	0.922738
hsa-miR-374c-5p	6.77014	9.5544	0.49698	0.922738
hsa-miR-3189-3p	0	0.173603	Inf	0.922738
hsa-sno-mgU6-53B	6.63352	9.35093	0.495335	0.922738
hsa-miR-766-3p	27.7026	21.8499	-0.342395	0.922738
hsa-miR-5571-3p	0	0.194462	Inf	0.922738
hsa-scr-HY1	1040.56	849.48	-0.292714	0.922738
hsa-miR-618	21.202	51.2197	1.2725	0.922738
hsa-miR-4722-5p	0	0.27765	Inf	0.922738
hsa-miR-1225-5p	0.174042	0	-Inf	0.922738
hsa-miR-770-5p	0	0.297365	Inf	0.922738
hsa-sno-U3-2	4718.17	4451.6	-0.083903	0.922738
hsa-sno-U3-4	4460.53	4270.49	-0.0628138	0.922738
hsa-sno-14q(II-9)	9.28333	21.8293	1.23355	0.922738
hsa-sno-14q(II-21)	6.67321	18.2614	1.45235	0.922738
hsa-miR-1260b	41.5798	59.627	0.520085	0.922738
hsa-miR-4753-5p	0.156138	0	-Inf	0.922738
hsa-miR-4739	0	0.297365	Inf	0.922738
hsa-miR-1307-5p	1432.5	1905.02	0.411279	0.922738
hsa-miR-3619-3p	0.234207	0.562527	1.26414	0.922738
hsa-miR-3148	0	0.173603	Inf	0.922738
hsa-miR-548q	0.549949	0.332715	-0.725009	0.922738
hsa-miR-4677-5p	0	0.194462	Inf	0.922738
hsa-miR-3175	0.174499	0	-Inf	0.922738
hsa-miR-4720-5p	0	0.225479	Inf	0.922738
hsa-miR-3117-5p	0	0.194462	Inf	0.922738
hsa-miR-887	114.884	95.3673	-0.268614	0.922738
hsa-tRNA-Tyr-TAC	6462.27	4709.54	-0.456454	0.922738
hsa-miR-524-3p	0	0.258724	Inf	0.922738
hsa-miR-4715-5p	0.201072	0	-Inf	0.922738
hsa-miR-4652-3p	0	0.182864	Inf	0.922738
hsa-sno-hTR	13.6207	15.8523	0.218888	0.922738
hsa-miR-491-3p	0	0.182864	Inf	0.922738
hsa-tRNA-Trp-TGG	3950.95	2995.59	-0.399357	0.922738
hsa-sno-SNORA36C	2.82078	3.43132	0.282672	0.922738
hsa-miR-6502-3p	0	0.258724	Inf	0.922738
hsa-miR-3607-5p	2.29542	1.51705	-0.59749	0.922738
hsa-miR-2964a-3p	0.238825	0.460909	0.948526	0.922738
hsa-miR-4474-3p	0.302616	0	-Inf	0.922738
hsa-miR-3181	0	0.297365	Inf	0.922738
hsa-scr-BC200	0.847633	1.13801	0.425002	0.922738
hsa-miR-365a-5p	56.0307	40.3225	-0.474634	0.922738
hsa-sno-HBII-52-32	10.7002	9.04888	-0.241821	0.922738
hsa-miR-1908	1.48011	0.556089	-1.41232	0.922738
hsa-sno-ACA19	4.92336	3.41569	-0.527465	0.922738
hsa-miR-449c-5p	12.3911	6.97843	-0.828335	0.922738
hsa-miR-6131	1.697	2.0266	0.256073	0.922738
hsa-miR-676-3p	1.15593	0.712675	-0.697732	0.922738
hsa-miR-421	125.277	109.639	-0.192359	0.922738
hsa-miR-3942-3p	0	0.27765	Inf	0.922738
hsa-miR-3975	0	0.194462	Inf	0.922738
hsa-miR-765	8.2147	6.45127	-0.348624	0.922738
hsa-sno-U3-2B	4718.17	4451.6	-0.083903	0.922738
hsa-sno-14q(II-26)	9.29579	20.4963	1.14071	0.922738
hsa-sno-HBII-52-25	3.7489	3.1331	-0.258874	0.922738
hsa-miR-5690	0	0.27765	Inf	0.922738
hsa-miR-5696	0.348541	1.08656	1.64036	0.922738
hsa-miR-103a-3p	70867	63964.4	-0.147844	0.922738
hsa-miR-1185-1-3p	5.27219	3.90397	-0.433458	0.922738
hsa-miR-103a-2-5p	3.85036	4.87309	0.339843	0.922738
hsa-miR-2110	129.83	149.787	0.206282	0.922738
hsa-miR-100-3p	2.43988	4.9606	1.02371	0.922738
hsa-miR-4512	0	0.225479	Inf	0.922738
hsa-miR-656	3.18856	5.56757	0.804146	0.922738
hsa-miR-518c-5p	0	0.27765	Inf	0.922738
hsa-miR-3140-5p	0	0.182864	Inf	0.922738
hsa-miR-5582-3p	0	0.262321	Inf	0.922738
hsa-sno-14q(II-11)	1.01339	2.65259	1.38821	0.922738
hsa-miR-922	0	0.224818	Inf	0.922738
hsa-sno-SNORA84	1.0774	1.44181	0.420328	0.922738
hsa-miR-219-2-3p	0.403487	1.06683	1.40273	0.922738
hsa-miR-3529-5p	1.19268	1.79718	0.59153	0.922738
hsa-miR-556-5p	4.13907	8.62221	1.05875	0.922738
hsa-miR-1306-3p	6.55368	9.4769	0.532109	0.922738
hsa-sno-ACA37	1.20632	2.31515	0.940489	0.922738
hsa-miR-145-3p	471.656	600.652	0.348793	0.922738
hsa-miR-1292-5p	14.8968	17.1025	0.199209	0.922738
hsa-sno-U35A	36.1874	42.9694	0.247822	0.922738
hsa-miR-4794	0.174499	0	-Inf	0.922738
hsa-miR-320e	5.56567	4.47691	-0.31405	0.922738
hsa-miR-320b	477.342	603.887	0.339254	0.922738
hsa-miR-548aw	4.13496	6.20874	0.586425	0.922738
hsa-miR-4745-5p	0	0.225479	Inf	0.922738
hsa-miR-4714-5p	0.201744	0	-Inf	0.922738
hsa-sno-HBII-52-44	30.8444	36.5985	0.246777	0.922738
hsa-sno-HBII-52-41	5.04887	4.18	-0.272455	0.922738
hsa-sno-U109	1.78286	0.735292	-1.27781	0.922738
hsa-sno-ACA26	140.364	154.615	0.13951	0.922738
hsa-sno-ACA28	78.5836	53.8787	-0.544513	0.922738
hsa-sno-ACA2b	9.94418	12.947	0.380693	0.922738
hsa-miR-4784	0	0.297365	Inf	0.922738
hsa-miR-4740-5p	0.201072	0	-Inf	0.922738
hsa-sno-ACA14b	11.0594	14.949	0.434779	0.922738
hsa-miR-4437	0	0.194462	Inf	0.922738
hsa-miR-4431	0.404675	0	-Inf	0.922738
hsa-miR-4649-3p	0	0.297365	Inf	0.922738
hsa-miR-485-3p	65.3195	82.6215	0.339005	0.922738
hsa-miR-4666a-3p	0.201744	0	-Inf	0.922738
hsa-sno-U65	18.6917	21.9224	0.230007	0.922738
hsa-miR-186-3p	23.1235	15.7428	-0.554674	0.922738
hsa-miR-1305	0	0.262321	Inf	0.922738
hsa-miR-3145-3p	0.576642	0.297365	-0.95544	0.922738
hsa-miR-3659	0.317924	0	-Inf	0.922738
hsa-miR-3655	0	0.225479	Inf	0.922738
hsa-tRNA-Leu-TTG	3655.66	4216.74	0.205996	0.922738
hsa-miR-3913-3p	0.174499	0	-Inf	0.922738
hsa-miR-5586-3p	0	0.182864	Inf	0.922738
hsa-miR-5004-5p	0	0.27765	Inf	0.922738
hsa-miR-5003-3p	0	0.27765	Inf	0.922738
hsa-miR-301a-5p	20.7068	30.0099	0.535337	0.922738
hsa-miR-4640-3p	0	0.182864	Inf	0.922738
hsa-miR-1245b-5p	0	0.297365	Inf	0.922738
hsa-miR-3692-3p	0	0.194462	Inf	0.922738
hsa-miR-3191-3p	0.201072	0	-Inf	0.922738
hsa-miR-5589-3p	0	0.173603	Inf	0.922738
hsa-miR-1261	61.4242	39.8261	-0.625092	0.922738
hsa-sno-14q(I-3)	4.3294	3.23554	-0.420162	0.922738
hsa-miR-4643	0	0.297365	Inf	0.922738
hsa-miR-3679-5p	2.1522	3.45607	0.683324	0.922738
hsa-miR-136-5p	42.7039	81.4693	0.931887	0.922738
hsa-miR-330-5p	10.2957	14.1822	0.462045	0.922738
hsa-miR-5581-3p	0.201744	0	-Inf	0.922738
hsa-miR-4458	2.8198	1.53693	-0.875538	0.922738
hsa-miR-564	0.201744	0	-Inf	0.922738
hsa-miR-6511b-5p	0.100872	0.312281	1.63032	0.922738
hsa-miR-4683	0.174499	0	-Inf	0.922738
hsa-miR-26a-5p	88673.2	77244.1	-0.199074	0.922738
hsa-miR-5094	0	0.258724	Inf	0.922738
hsa-miR-486-5p	1157.01	1559.44	0.430626	0.922738
hsa-miR-335-3p	31.2653	26.6437	-0.23077	0.922738
hsa-miR-1275	3.02607	2.17735	-0.474871	0.922738
hsa-miR-1268a	0.201072	0	-Inf	0.922738
hsa-tRNA-Ser-AGY	5211.73	4085.65	-0.351198	0.922738
hsa-sno-HBII-166	25.5789	17.9783	-0.5087	0.922738
hsa-miR-4804-5p	1.20611	2.35816	0.967301	0.922738
hsa-miR-423-3p	2075.16	2418.88	0.221117	0.922738
hsa-miR-98-3p	22.0053	16.1721	-0.444343	0.922738
hsa-miR-3116	0.514229	0.27765	-0.889144	0.922738
hsa-miR-3115	0	0.297365	Inf	0.922738
hsa-miR-4664-5p	0	0.225479	Inf	0.922738
hsa-sno-U34	48.9962	54.8979	0.164081	0.922738
hsa-miR-382-3p	57.0642	76.5126	0.423113	0.922738
hsa-miR-30e-5p	32301.1	27061	-0.255366	0.922738
hsa-miR-3660	1.60947	2.5181	0.645757	0.922738
hsa-miR-3662	0	0.173603	Inf	0.922738
hsa-miR-4696	0	0.194462	Inf	0.922738
hsa-tRNA-Pro-CCG	559.207	630.322	0.172708	0.922738
hsa-miR-4501	0	0.224818	Inf	0.922738
hsa-miR-5585-5p	0	0.27765	Inf	0.922738
hsa-miR-937-3p	0.513556	0.27765	-0.887257	0.922738
hsa-miR-636	0.201072	0	-Inf	0.922738
hsa-miR-17-5p	1480.41	1314.73	-0.171232	0.922738
hsa-miR-4672	0.201744	0	-Inf	0.922738
hsa-miR-371a-3p	0.539566	1.22103	1.17823	0.922738
hsa-miR-492	0	0.225479	Inf	0.922738
hsa-miR-99a-5p	74020	59223.2	-0.321752	0.922738
hsa-miR-1227-3p	0.463492	0.258724	-0.841134	0.922738
hsa-miR-3125	4.17911	2.243	-0.897764	0.922738
hsa-sno-14q(I-6)	1.3766	3.27446	1.25015	0.922738
hsa-miR-365a-3p	208.109	166.562	-0.321278	0.922738
hsa-tRNA-Leu-CTA	594.498	719.433	0.275189	0.922738
hsa-sno-14q(II-15)	1.01339	2.84705	1.49028	0.922738
hsa-sno-14q(I-8)	11.5883	26.3177	1.18336	0.922738
hsa-miR-3925-5p	0	0.225479	Inf	0.922738
hsa-miR-1298	0.201744	0	-Inf	0.922738
hsa-miR-1291	187.988	225.816	0.264506	0.922738
hsa-miR-365b-3p	208.109	166.562	-0.321278	0.922738
hsa-sno-HBII-115	3.64636	5.3777	0.56053	0.922738
hsa-miR-4641	0	0.27765	Inf	0.922738
hsa-miR-4723-5p	0	0.225479	Inf	0.922738
hsa-miR-3134	0.269783	0.60054	1.15446	0.922738
hsa-miR-4761-3p	0.201744	0.521083	1.36899	0.922738
hsa-miR-3139	0.440589	1.00975	1.19649	0.922738
hsa-miR-5194	0.302616	0	-Inf	0.922738
hsa-miR-1301	30.2494	33.7188	0.156645	0.922738
hsa-miR-3911	0.26609	0.613564	1.2053	0.922738
hsa-miR-3919	0.174499	0	-Inf	0.922738
hsa-miR-3918	0.174499	0	-Inf	0.922738
hsa-miR-1287	13.5189	16.0598	0.248469	0.922738
hsa-miR-1288	0	0.297365	Inf	0.922738
hsa-sno-U17b	170.762	131.396	-0.378074	0.923192
hsa-miR-186-5p	4923	4320.04	-0.188492	0.923397
hsa-miR-200c-3p	9465.25	17022.2	0.846705	0.923397
hsa-miR-192-5p	456628	568749	0.316775	0.923842
hsa-miR-4768-3p	0.26609	0	-Inf	0.923952
hsa-miR-611	0.26609	0	-Inf	0.923952
hsa-miR-96-3p	0.26609	0	-Inf	0.923952
hsa-miR-4494	0.269783	0	-Inf	0.923952
hsa-miR-4522	0.26609	0	-Inf	0.923952
hsa-miR-3143	0.269783	0	-Inf	0.923952
hsa-sno-ACA57	648.002	714.499	0.140934	0.923952
hsa-miR-3167	0.269783	0	-Inf	0.923952
hsa-miR-6508-5p	0.26609	0	-Inf	0.923952
hsa-miR-3165	1.27969	0.728608	-0.812579	0.923952
hsa-miR-2116-5p	0.211949	0	-Inf	0.923952
hsa-sno-HBII-52-11	5.1084	4.29241	-0.251084	0.923952
hsa-miR-4766-3p	0.26609	0	-Inf	0.923952
hsa-sno-HBII-13	467.387	379.488	-0.300562	0.923952
hsa-miR-3188	0.560812	0.27765	-1.01425	0.923952
hsa-sno-14q(II-12)	15.8055	30.7936	0.962204	0.923952
hsa-sno-HBII-52-36	5.1084	4.29241	-0.251084	0.923952
hsa-miR-650	0.26609	0	-Inf	0.923952
hsa-miR-126-5p	3199.46	2845.44	-0.169177	0.923952
hsa-sno-HBII-52-29	5.1084	4.29241	-0.251084	0.923952
hsa-miR-548t-5p	0.211949	0.419941	0.986469	0.923952
hsa-miR-3622b-3p	0.269783	0	-Inf	0.923952
hsa-miR-1226-5p	0.269783	0	-Inf	0.923952
hsa-miR-4684-3p	0.269783	0	-Inf	0.923952
hsa-miR-106b-5p	1403.02	1666.38	0.248182	0.923952
hsa-miR-320c	92.2064	105.994	0.201046	0.923952
hsa-sno-HBII-52-43	5.1084	4.29241	-0.251084	0.923952
hsa-sno-ACA23	7.92674	5.91967	-0.42121	0.923952
hsa-sno-ACA14a	2.53575	3.01304	0.248809	0.923952
hsa-miR-92a-2-5p	0.269783	0	-Inf	0.923952
hsa-miR-4751	0.26609	0	-Inf	0.923952
hsa-miR-3120-5p	0.269783	0	-Inf	0.923952
hsa-miR-4761-5p	0.26609	0	-Inf	0.923952
hsa-tRNA-His-CAY_	3360.36	3566.66	0.0859591	0.923952
hsa-miR-4471	0.269783	0	-Inf	0.923952
hsa-sno-U20	310.946	360.297	0.212523	0.923952
hsa-miR-4776-5p	0.269783	0	-Inf	0.923952
hsa-miR-200c-5p	0.390344	1.2365	1.66344	0.923952
hsa-miR-4679	0.275907	0	-Inf	0.924767
hsa-miR-3064-5p	5.19496	3.86076	-0.428226	0.925471
hsa-sno-HBII-429	189.964	206.637	0.12137	0.925667
hsa-miR-6134	0.426153	0.224818	-0.922612	0.925667
hsa-miR-376a-2-5p	7.34996	14.2132	0.951422	0.925667
hsa-sno-HBII-52-5	6.78524	9.20739	0.440392	0.925667
hsa-miR-6125	1.46719	2.08868	0.509539	0.92711
hsa-miR-3131	0.986318	0.738953	-0.416569	0.92711
hsa-sno-ACA55	10.2705	7.6907	-0.417319	0.929437
hsa-miR-1185-5p	20.135	16.5007	-0.287176	0.929974
hsa-miR-494	57.1472	75.9029	0.409471	0.929974
hsa-miR-2964a-5p	2.13308	3.1632	0.568447	0.93044
hsa-sno-ACA22	1.24994	1.79198	0.519702	0.931134
hsa-sno-14q(II-16)	2.17417	4.38705	1.01278	0.93202
hsa-sno-ACA21	15.5497	19.533	0.329026	0.932036
hsa-sno-ACA43	10.3022	12.4244	0.270216	0.934447
hsa-miR-24-3p	25827	32086.5	0.313086	0.934907
hsa-miR-466	0.269783	0.483542	0.84184	0.937485
hsa-miR-1306-5p	7.91957	6.5891	-0.265341	0.940607
hsa-sno-ACA38	1.13405	1.42095	0.325375	0.940655
hsa-miR-874	52.1718	40.9326	-0.35002	0.942779
hsa-miR-23c	67.8334	56.172	-0.272146	0.942779
hsa-miR-139-3p	803.324	744.222	-0.110249	0.943666
hsa-sno-ACA24	14.3323	17.8553	0.317081	0.943666
hsa-miR-299-3p	6.95111	12.4614	0.842147	0.945122
hsa-miR-148b-5p	390.028	481.211	0.303092	0.947024
hsa-sno-HBII-52-39	4.87482	4.18	-0.221846	0.947024
hsa-miR-4492	126.51	101.73	-0.314511	0.948783
hsa-miR-3607-3p	80.7178	92.8771	0.202435	0.948783
hsa-miR-5699	2.2698	2.99138	0.398249	0.950034
hsa-miR-196b-5p	4688.72	5461.56	0.220118	0.950781
hsa-miR-323b-3p	4.41148	3.16032	-0.481192	0.95249
hsa-miR-503-5p	1914.3	2199.07	0.200076	0.953434
hsa-sno-U14A	31.1902	33.2337	0.0915572	0.955154
hsa-sno-SNORA11C	0.924355	0.598741	-0.626515	0.955154
hsa-miR-3127-5p	5.71172	4.0564	-0.493723	0.955154
hsa-sno-ACA67	5.0779	5.17509	0.0273508	0.955154
hsa-miR-148a-3p	66841.7	80960.5	0.276469	0.955566
hsa-miR-4732-5p	4.16178	5.22247	0.327531	0.955661
hsa-miR-1260a	81.3148	103.457	0.347449	0.955972
hsa-miR-29a-3p	157873	170683	0.112558	0.955972
hsa-sno-mgU12-22/U4-8	238.01	268.937	0.176246	0.956354
hsa-sno-HBII-135	54.4883	48.8389	-0.157916	0.95701
hsa-miR-181a-2-3p	362.846	347.805	-0.06108	0.95736
hsa-miR-433	21.7798	25.6279	0.234723	0.95736
hsa-miR-3202	0.78945	0.577209	-0.451756	0.958839
hsa-sno-SNORA11E	1.93478	1.30856	-0.56419	0.959568
hsa-sno-SNORA11D	1.93478	1.30856	-0.56419	0.959568
hsa-sno-HBII-251	1733.12	2118.21	0.289474	0.960971
hsa-tRNA-Ala-GCG	32549.1	35812.6	0.13785	0.965744
hsa-sno-HBII-436	24.4406	21.199	-0.205287	0.965744
hsa-miR-93-5p	4935.49	4471.56	-0.142415	0.966341
hsa-sno-HBII-52-13	7.43646	6.60762	-0.170486	0.966341
hsa-miR-3193	0.604559	0.446048	-0.438684	0.966341
hsa-let-7f-1-3p	18.8633	17.4617	-0.111386	0.966341
hsa-miR-154-3p	5.23579	6.13792	0.229343	0.966341
hsa-miR-340-3p	12.1762	11.1239	-0.130399	0.966616
hsa-sno-HBII-52-38	9.40095	8.27852	-0.183433	0.966709
hsa-miR-15a-5p	1888.06	2153.49	0.189771	0.966709
hsa-miR-101-5p	29.3099	25.9625	-0.174959	0.971718
hsa-sno-HBII-52-12	7.04385	6.33222	-0.153653	0.974415
hsa-miR-548s	0.404675	0.499776	0.304518	0.974415
hsa-miR-323a-3p	20.3032	24.4957	0.270822	0.974415
hsa-miR-411-5p	647.488	836.127	0.368868	0.974415
hsa-sno-HBII-52-9	7.04385	6.33222	-0.153653	0.974415
hsa-miR-3198	0.269783	0.365729	0.438974	0.974713
hsa-miR-92a-1-5p	34.9495	38.1389	0.125992	0.974891
hsa-miR-376b-5p	1.07855	1.72864	0.680536	0.976154
hsa-miR-376c-5p	1.07855	1.72864	0.680536	0.976154
hsa-scr-HY5	1728.96	1899.83	0.135961	0.978357
hsa-let-7f-2-3p	5.00167	6.1946	0.308602	0.978357
hsa-miR-3199	6.62687	9.00332	0.442129	0.978357
hsa-miR-3157-5p	0.842182	1.15756	0.458886	0.978357
hsa-miR-302a-5p	1.15209	2.18335	0.922284	0.978357
hsa-miR-320a	6949.33	6613.34	-0.0714941	0.978357
hsa-miR-126-3p	26902.2	23554.2	-0.191741	0.978357
hsa-sno-14q(I-4)	4.78021	4.31627	-0.147287	0.978357
hsa-miR-659-5p	13.9316	15.7619	0.178082	0.978357
hsa-miR-4419b	0.399134	0.704772	0.820281	0.978831
hsa-miR-411-3p	11.8585	10.1815	-0.219976	0.980456
hsa-let-7e-5p	33952.1	37303.8	0.135824	0.982614
hsa-miR-3613-3p	7.61678	7.1607	-0.0890809	0.982614
hsa-miR-3117-3p	56.5622	48.4428	-0.223558	0.982614
hsa-sno-U45A	138.372	142.931	0.0467712	0.982983
hsa-tRNA-Ala-GCY_	9343.12	10027.8	0.102036	0.982983
hsa-miR-138-5p	552.451	559.575	0.0184831	0.982983
hsa-miR-4436b-3p	0.402815	0.261422	-0.623737	0.982983
hsa-miR-643	1.09272	1.22533	0.165243	0.982983
hsa-miR-377-5p	11.1738	13.6654	0.290418	0.982983
hsa-miR-577	211.529	285.713	0.433712	0.982983
hsa-sno-14q(II-17)	9.64195	15.2311	0.659619	0.982983
hsa-miR-369-5p	28.7256	32.4745	0.176968	0.983348
hsa-miR-1245b-3p	0.467833	0.872381	0.898963	0.983348
hsa-miR-6506-5p	2.45847	2.08833	-0.235412	0.983348
hsa-sno-HBII-289	2583.3	2759.25	0.0950618	0.983348
hsa-miR-15a-3p	1.62432	1.9673	0.276376	0.98364
hsa-miR-616-5p	0.590265	0.73045	0.307423	0.98364
hsa-miR-337-3p	10.2777	9.94327	-0.0477241	0.98364
hsa-miR-376a-5p	54.8194	82.8799	0.596337	0.984432
hsa-miR-5187-3p	0.764791	0.533156	-0.52051	0.984642
hsa-miR-376b-3p	8.24757	10.9843	0.413404	0.984642
hsa-sno-ACA31	18.9404	18.9056	-0.00264989	0.984642
hsa-miR-4660	1.07761	1.5988	0.569157	0.984642
hsa-miR-136-3p	39.5432	37.7546	-0.0667772	0.984646
hsa-miR-5580-3p	0.174499	0.517447	1.56819	0.985038
hsa-miR-299-5p	17.351	15.4964	-0.163089	0.985038
hsa-sno-U91	231.321	256.547	0.149326	0.985038
hsa-let-7b-5p	201493	183103	-0.138072	0.985038
hsa-miR-181a-5p	13169.7	12532.1	-0.0715858	0.985038
hsa-miR-675-5p	2.1014	2.61325	0.314492	0.986469
hsa-miR-132-5p	70.4497	57.3674	-0.296361	0.986493
hsa-sno-14q(0)	41.6144	58.2819	0.485966	0.986493
hsa-miR-15b-5p	2142.5	1974.65	-0.117702	0.986493
hsa-miR-767-5p	0.174042	0.5553	1.67383	0.987145
hsa-miR-3691-5p	1.88533	1.22135	-0.626337	0.987145
hsa-miR-4662b	3.34345	2.50082	-0.418935	0.987145
hsa-sno-HBI-43	703.852	747.107	0.0860416	0.987145
hsa-miR-6505-5p	2.18956	1.74998	-0.323302	0.987145
hsa-miR-6717-5p	0.357209	0.173603	-1.04098	0.987145
hsa-miR-432-5p	115.322	126.127	0.129205	0.987145
hsa-miR-4647	50.5581	45.0646	-0.165947	0.987145
hsa-miR-134	271.54	338.409	0.3176	0.990135
hsa-miR-5703	0.440132	0.258724	-0.766523	0.991041
hsa-miR-3149	0.872998	0.53268	-0.712708	0.991041
hsa-miR-499a-3p	0.33018	0.224818	-0.554493	0.991041
hsa-miR-4802-5p	0.467161	0.297365	-0.651684	0.991041
hsa-miR-30e-3p	4912.56	4431	-0.148841	0.991041
hsa-tRNA-Met_	1752.51	1781	0.023265	0.991041
hsa-miR-193b-3p	221.055	220.033	-0.00668147	0.991041
hsa-miR-744-5p	1133.36	1064.24	-0.0907786	0.991041
hsa-miR-17-3p	560.949	568.259	0.0186803	0.991041
hsa-miR-589-3p	20.0401	20.9765	0.0658845	0.991041
hsa-miR-4726-5p	0.357209	0.225479	-0.663777	0.991041
hsa-miR-4469	0.535873	0.258724	-1.05048	0.991041
hsa-miR-484	163.081	162.38	-0.00622002	0.991041
hsa-miR-4639-5p	0.33018	0.27765	-0.249985	0.991041
hsa-miR-4703-3p	0.261749	0.562045	1.1025	0.991041
hsa-sno-U50B	363.669	334.286	-0.121544	0.992488
hsa-miR-425-5p	540.431	605.136	0.16315	0.997874
hsa-sno-U32B	0.275907	0.138825	-0.990915	1
hsa-miR-29b-1-5p	16.7388	17.4472	0.0597913	1
hsa-miR-5004-3p	0	0.138825	Inf	1
hsa-miR-4654	1.34892	1.39456	0.048014	1
hsa-miR-4657	3.4336	2.45639	-0.483184	1
hsa-miR-5700	0	0.112409	Inf	1
hsa-miR-639	0.531251	0.716645	0.431865	1
hsa-miR-454-3p	60.1611	61.1311	0.0230769	1
hsa-miR-3141	0	0.11274	Inf	1
hsa-miR-3146	0.457745	0.52081	0.186212	1
hsa-miR-485-5p	401.479	324.864	-0.305489	1
hsa-tRNA-Thr-ACY_	119.888	129.489	0.111135	1
hsa-tRNA-Ser-TCG	703.371	672.332	-0.0651118	1
hsa-miR-130a-3p	5647.09	5419.14	-0.0594426	1
hsa-sno-U96b	0.087021	0.0868016	-0.00364091	1
hsa-miR-3928	122.486	121.822	-0.007849	1
hsa-sno-HBII-382	283.4	259.74	-0.125772	1
hsa-miR-3676-3p	853.464	958.229	0.167039	1
hsa-miR-544b	0.931314	0.789193	-0.23889	1
hsa-miR-4786-5p	0.201744	0.224818	0.156235	1
hsa-miR-548ar-3p	3.39006	4.06757	0.262855	1
hsa-miR-7-1-3p	46.9797	46.56	-0.0129479	1
hsa-sno-ACA53	183.595	189.624	0.0466111	1
hsa-sno-SNORD124	2.81626	2.49439	-0.175092	1
hsa-sno-SNORD126	44.7555	45.2979	0.01738	1
hsa-miR-4539	0	0.097231	Inf	1
hsa-miR-381-3p	244.668	335.099	0.453762	1
hsa-miR-195-5p	5660.59	5368.02	-0.0765622	1
hsa-miR-3126-5p	1.16723	1.12249	-0.0563937	1
hsa-miR-4520a-3p	0.403487	0.461535	0.193916	1
hsa-sno-14q(II-30)	0.100536	0	-Inf	1
hsa-miR-4632-5p	0.100872	0	-Inf	1
hsa-miR-4685-3p	0.43566	0.609592	0.484639	1
hsa-sno-14q(II-4)	0.49109	0.918125	0.902704	1
hsa-miR-5708	0.301607	0.297365	-0.0204352	1
hsa-miR-495-5p	2.26355	1.99708	-0.180699	1
hsa-miR-137	2.9167	2.60405	-0.16358	1
hsa-miR-664b-3p	2.55469	2.50765	-0.0268124	1
hsa-scr-HY3	2526.83	2313.57	-0.12721	1
hsa-tRNA-Ile-ATA	252.143	266.31	0.0788625	1
hsa-miR-652-5p	7.08948	6.59707	-0.103855	1
hsa-miR-4640-5p	0.100872	0.11274	0.160469	1
hsa-miR-612	0	0.138825	Inf	1
hsa-miR-100-5p	57241.4	55497.1	-0.0446462	1
hsa-miR-3168	441.52	470.844	0.0927697	1
hsa-miR-3136-5p	0.275907	0.410105	0.571812	1
hsa-miR-6502-5p	2.18492	2.43635	0.157137	1
hsa-miR-19b-3p	369.855	377.626	0.0300016	1
hsa-miR-450a-3p	67.9642	69.6674	0.0357082	1
hsa-miR-143-3p	598325	629813	0.0739935	1
hsa-miR-4768-5p	0.59794	0.55093	-0.118133	1
hsa-sno-14q(II-10)	1.31236	1.54	0.230767	1
hsa-miR-1	5786.81	6382.37	0.141324	1
hsa-sno-ACA8	35.3061	32.1671	-0.134333	1
hsa-miR-151a-3p	9724.33	9969.51	0.0359229	1
hsa-miR-2116-3p	0.694517	0.793085	0.191467	1
hsa-miR-3177-3p	0.988996	1.07291	0.117489	1
hsa-miR-2115-3p	0.156138	0.225479	0.530174	1
hsa-miR-548v	1.38911	1.08348	-0.35848	1
hsa-miR-548u	0.403487	0.365729	-0.141749	1
hsa-miR-4511	1.0699	1.26626	0.243097	1
hsa-miR-6514-3p	0	0.148683	Inf	1
hsa-miR-381-5p	1.11932	1.15667	0.0473464	1
hsa-miR-6133	0.105975	0.097231	-0.12423	1
hsa-miR-889	37.0352	38.0594	0.0393579	1
hsa-miR-23b-5p	914.988	893.235	-0.0347123	1
hsa-miR-18a-3p	2.13304	2.52002	0.240523	1
hsa-miR-548x-3p	0.134892	0	-Inf	1
hsa-miR-4289	0.0872496	0	-Inf	1
hsa-miR-127-5p	33.012	33.2313	0.00955397	1
hsa-miR-3664-5p	0.156138	0.224818	0.52594	1
hsa-miR-3605-5p	111.858	98.0821	-0.189612	1
hsa-miR-664b-5p	39.6317	38.748	-0.0325333	1
hsa-miR-548b-3p	0.764414	0.779807	0.0287621	1
hsa-miR-20a-3p	10.819	11.9794	0.146995	1
hsa-miR-4721	0.0872496	0.173603	0.992574	1
hsa-miR-5010-3p	1.34003	1.38378	0.0463483	1
hsa-miR-497-3p	13.1055	11.5694	-0.179863	1
hsa-sno-ACA66	0.134892	0.173603	0.363994	1
hsa-miR-615-5p	4.74941	4.64211	-0.0329695	1
hsa-miR-3152-3p	0.269783	0.338219	0.326155	1
hsa-miR-4500	0.275907	0.225479	-0.291188	1
hsa-tRNA-Lys-AAG	8022.94	7103.28	-0.175646	1
hsa-miR-4508	727.697	709.389	-0.0367602	1
hsa-miR-4709-5p	0.79849	1.00494	0.331758	1
hsa-miR-410	34.5679	39.2339	0.182666	1
hsa-miR-412	0.100872	0	-Inf	1
hsa-miR-28-5p	1324.42	1309.44	-0.0164173	1
hsa-miR-3183	0.26609	0.182864	-0.541138	1
hsa-miR-3192	1.11319	1.15082	0.0479656	1
hsa-miR-5100	284.312	320.297	0.171935	1
hsa-miR-4707-3p	0.523497	0.460514	-0.184936	1
hsa-sno-U82	277.991	272.101	-0.0308974	1
hsa-miR-93-3p	11.9026	11.9826	0.00965261	1
hsa-sno-HBII-52-37	0.0780689	0	-Inf	1
hsa-sno-HBII-52-30	3.30066	3.22312	-0.0342957	1
hsa-miR-146a-3p	1.05724	1.15276	0.124785	1
hsa-miR-323a-5p	0.174499	0.225479	0.369773	1
hsa-miR-22-5p	714.759	664.33	-0.105557	1
hsa-miR-3620-5p	0	0.11274	Inf	1
hsa-miR-3196	53.5408	52.7134	-0.0224696	1
hsa-miR-877-3p	0.0872496	0.27765	1.67005	1
hsa-tRNA-Thr-ACY	1767.35	1987.63	0.169461	1
hsa-miR-196a-3p	438.124	426.324	-0.0393887	1
hsa-miR-548y	0	0.131161	Inf	1
hsa-tRNA-Thr-ACA	251.734	244.242	-0.0435861	1
hsa-miR-3976	0.137953	0	-Inf	1
hsa-miR-197-3p	103.775	108.146	0.0595286	1
hsa-sno-HBII-52-26	4.96184	4.51789	-0.135227	1
hsa-miR-4749-5p	1.61751	1.51655	-0.0929872	1
hsa-miR-5579-5p	0.174042	0.258724	0.571977	1
hsa-miR-4741	0.425921	0.635584	0.577497	1
hsa-miR-26a-1-3p	1.65043	1.48044	-0.156819	1
hsa-miR-219-5p	7.17958	6.84075	-0.0697449	1
hsa-sno-U103B	44.578	40.6526	-0.132983	1
hsa-sno-U19-2	7.76284	7.21058	-0.10647	1
hsa-miR-6129	3.99326	4.49826	0.171801	1
hsa-miR-3180-5p	0	0.148683	Inf	1
hsa-miR-377-3p	19.3746	24.1888	0.320172	1
hsa-miR-542-3p	1444.5	1465.47	0.0207904	1
hsa-miR-935	8.59494	7.80581	-0.138938	1
hsa-miR-503-3p	4.29947	4.7355	0.139358	1
hsa-miR-125b-1-3p	86.6767	83.2038	-0.058996	1
hsa-tRNA-His-CAY	0.137953	0	-Inf	1
hsa-sno-mgU2-25/61	293.246	266.109	-0.140092	1
hsa-miR-135b-5p	105.871	93.6085	-0.177599	1
hsa-miR-6509-3p	0.100872	0	-Inf	1
hsa-miR-345-5p	318.271	330.733	0.055411	1
hsa-miR-379-3p	2.53501	3.6635	0.531235	1
hsa-miR-4775	0.26609	0.225479	-0.238919	1
hsa-miR-5684	0.408706	0.656918	0.68465	1
hsa-miR-4779	0.201072	0.297365	0.564527	1
hsa-sno-ACA36	42.4116	42.4888	0.00262228	1
hsa-sno-ACA30	0	0.097231	Inf	1
hsa-miR-4446-3p	0.201072	0.388085	0.948665	1
hsa-sno-HBII-85-11	0.777016	0.483115	-0.685577	1
hsa-miR-125a-3p	29.3316	33.3613	0.185717	1
hsa-miR-4792	0.134892	0	-Inf	1
hsa-miR-320d	46.5188	46.2895	-0.00712996	1
hsa-miR-517a-3p	0.134892	0.138825	0.0414661	1
hsa-miR-5590-3p	13.1206	13.933	0.0866672	1
hsa-miR-517b-3p	0.134892	0.138825	0.0414661	1
hsa-miR-301a-3p	26.0646	27.2289	0.0630458	1
hsa-miR-4689	0.275907	0.225479	-0.291188	1
hsa-sno-HBII-52-40	5.5131	5.38636	-0.0335537	1
hsa-miR-218-5p	128.437	129.137	0.00784076	1
hsa-sno-U108	3.65731	4.12692	0.174282	1
hsa-sno-U103	44.578	40.6526	-0.132983	1
hsa-miR-4767	0.256674	0.398303	0.633933	1
hsa-miR-1290	0	0.0868016	Inf	1
hsa-miR-548ak	0.100872	0	-Inf	1
hsa-miR-4999-5p	1.58724	1.42977	-0.15074	1
hsa-miR-4757-5p	0.567697	0.539971	-0.0722389	1
hsa-miR-191-3p	3.25974	2.67316	-0.286212	1
hsa-miR-4434	1.47232	1.11691	-0.39857	1
hsa-miR-4430	0.389865	0.295604	-0.39931	1
hsa-miR-4797-3p	0.100872	0.0914322	-0.141749	1
hsa-miR-135b-3p	8.2356	8.38792	0.0264402	1
hsa-miR-6718-5p	0.368087	0.48023	0.383679	1
hsa-miR-4536-3p	2.35333	2.108	-0.158829	1
hsa-miR-4662a-5p	7.51524	8.29789	0.142926	1
hsa-miR-548ay-3p	0.530846	0.260405	-1.02754	1
hsa-miR-3129-3p	0.234207	0.399082	0.768905	1
hsa-miR-3678-5p	0	0.0868016	Inf	1
hsa-miR-4442	2.83612	2.53728	-0.160639	1
hsa-miR-671-3p	5.07463	4.9929	-0.0234233	1
hsa-miR-4449	7.75171	7.69635	-0.0103395	1
hsa-miR-2276	5.82993	4.70703	-0.308662	1
hsa-miR-2278	0.174499	0.260405	0.577537	1
hsa-miR-370	17.5358	20.1429	0.199971	1
hsa-sno-U36C	26.0094	22.5387	-0.206628	1
hsa-miR-1909-5p	0.100872	0	-Inf	1
hsa-miR-4659b-3p	0.201744	0.225479	0.160469	1
hsa-miR-499a-5p	305.116	270.496	-0.173754	1
hsa-miR-19b-1-5p	2.73808	3.53289	0.367688	1
hsa-miR-431-3p	0.82772	0.563698	-0.554222	1
hsa-miR-380-3p	0.92704	1.04389	0.171265	1
hsa-miR-1245a	0.269783	0.225479	-0.258807	1
hsa-miR-302a-3p	0.134892	0	-Inf	1
hsa-sno-ACA12	0.100872	0	-Inf	1
hsa-miR-371b-5p	0.234207	0.173603	-0.431988	1
hsa-miR-581	0.591242	0.670866	0.182275	1
hsa-miR-5091	60.003	61.1833	0.0281036	1
hsa-miR-373-3p	0.560812	0.832949	0.570711	1
hsa-miR-548h-5p	0.706103	0.599641	-0.23578	1
hsa-miR-4324	0	0.11274	Inf	1
hsa-miR-1258	0.100536	0.112409	0.161049	1
hsa-miR-1268b	0.201072	0.097231	-1.04822	1
hsa-miR-1228-5p	0.467833	0.554014	0.243928	1
hsa-miR-1322	0	0.131161	Inf	1
hsa-miR-4668-5p	0.26609	0.225479	-0.238919	1
hsa-miR-3677-3p	0.269783	0.230257	-0.228555	1
hsa-sno-14q(II-1)	37.1485	42.9159	0.20821	1
hsa-sno-ACA68	0.137953	0	-Inf	1
hsa-miR-4682	0.26609	0.297365	0.160324	1
hsa-miR-1236-5p	0.269783	0.225479	-0.258807	1
hsa-miR-150-3p	7.68953	7.02622	-0.130147	1
hsa-miR-4463	0.137953	0	-Inf	1
hsa-miR-4690-5p	0.201072	0.194462	-0.0482217	1
hsa-miR-491-5p	10.4884	10.9559	0.0629266	1
hsa-sno-U33	238.413	247.182	0.0521071	1
hsa-miR-4774-5p	0.467833	0.450958	-0.0530015	1
hsa-tRNA-Cys-TGY	1743.85	1749.29	0.0044946	1
hsa-miR-4750-5p	1.58293	1.41494	-0.161854	1
hsa-tRNA-Pro-CCY	1342.13	1350.7	0.00917348	1
hsa-tRNA-Ala-GCA	1190.46	1192.68	0.00268396	1
hsa-miR-20a-5p	2477.21	2522.1	0.0259042	1
hsa-miR-4790-5p	0.100872	0	-Inf	1
hsa-miR-6511a-3p	1.03281	1.16079	0.168525	1
hsa-miR-760	5.2287	4.90139	-0.0932609	1
hsa-miR-555	0.201072	0.129362	-0.636298	1
hsa-miR-6511b-3p	3.06325	3.35571	0.131556	1
hsa-miR-5588-3p	0.62915	0.715545	0.185639	1
hsa-miR-4638-3p	0.539566	0.27765	-0.958534	1
hsa-tRNA-Leu-CTY	2228.13	2282.15	0.0345622	1
hsa-miR-3074-3p	0.678401	0.670866	-0.0161137	1
hsa-miR-3915	0.275907	0.225479	-0.291188	1
hsa-miR-3682-3p	0.234207	0.41928	0.840133	1
hsa-miR-3611	0.201744	0.262321	0.378811	1
hsa-miR-3615	25.5388	24.9639	-0.0328436	1
hsa-miR-3676-5p	317.708	360.696	0.183082	1
hsa-miR-4800-3p	0.134892	0	-Inf	1
hsa-miR-628-3p	12.4565	13.4661	0.112436	1
hsa-miR-30b-3p	201.458	170.767	-0.238447	1
hsa-miR-3150a-5p	1.34654	1.39374	0.0497065	1
hsa-miR-5001-5p	3.23052	2.89637	-0.157522	1
hsa-miR-3917	0.746762	0.913234	0.290336	1
hsa-miR-3912	18.5701	21.088	0.183442	1
hsa-miR-1193	0.26609	0.258724	-0.0405005	1
hsa-sno-14q(II-6)	0.664255	1.01536	0.612175	1
hsa-sno-HBII-52-7	1.36879	1.35032	-0.0195987	1
hsa-sno-HBII-52-8	15.8736	16.97	0.0963597	1
hsa-miR-1303	0.087021	0	-Inf	1
hsa-miR-3667-5p	0	0.0914322	Inf	1

## Sheet: T2
id_rna	interaction_type	gene_symbol
hsa-miR-590-3p	binds	LTBP4
hsa-miR-590-3p	binds	ESRRG
hsa-miR-590-3p	binds	PAPPA
hsa-miR-590-3p	binds	ACSL4
hsa-miR-590-3p	binds	RALBP1
hsa-miR-590-3p	binds	KLHL3
hsa-miR-590-3p	binds	KITLG
hsa-miR-590-3p	binds	PRKCA
hsa-miR-590-3p	binds	GAD1
hsa-miR-590-3p	binds	MXRA5
hsa-miR-590-3p	binds	TWSG1
hsa-miR-590-3p	binds	WT1
hsa-miR-590-3p	binds	SLC19A2
hsa-miR-590-3p	binds	ESRP2
hsa-miR-590-3p	binds	GPHN
hsa-miR-590-3p	binds	DMRT2
hsa-miR-590-3p	binds	MPP7
hsa-miR-590-3p	binds	PFN2
hsa-miR-590-3p	binds	ANGPTL1
hsa-miR-590-3p	binds	CALB1
hsa-miR-590-3p	binds	PCDH9
hsa-miR-590-3p	binds	C1QTNF7
hsa-miR-590-3p	binds	LPL
hsa-miR-590-3p	binds	ANK2
hsa-miR-590-3p	binds	TBC1D9
hsa-miR-590-3p	binds	LIX1
hsa-miR-590-3p	binds	CASR
hsa-miR-590-3p	binds	ATP6V1A
hsa-miR-590-3p	binds	SLC20A2
hsa-miR-590-3p	binds	LAPTM4B
hsa-miR-590-3p	binds	PRSS35
hsa-miR-590-3p	binds	HIF1A
hsa-miR-590-3p	binds	PKIA
hsa-miR-590-3p	binds	PTGER3
hsa-miR-590-3p	binds	RIMBP2
hsa-miR-590-3p	binds	ANK3
hsa-miR-590-3p	binds	C15orf59
hsa-miR-590-3p	binds	SLC26A7
hsa-miR-590-3p	binds	MPPED2
hsa-miR-590-3p	binds	LSAMP
hsa-miR-590-3p	binds	MAP9
hsa-miR-590-3p	binds	TFAP2A
hsa-miR-590-3p	binds	SLC7A8
hsa-miR-590-3p	binds	RPS6KA6
hsa-miR-590-3p	binds	PANK1
hsa-miR-590-3p	binds	LMO3
hsa-miR-590-3p	binds	C9orf5
hsa-miR-590-3p	binds	PAQR5
hsa-miR-590-3p	binds	FAM5C
hsa-miR-590-3p	binds	CROT
hsa-miR-590-3p	binds	UST
hsa-miR-590-3p	binds	DENND1B
hsa-miR-590-3p	binds	AUH
hsa-miR-590-3p	binds	WASF3
hsa-miR-590-3p	binds	AKAP3
hsa-miR-590-3p	binds	MEST
hsa-miR-590-3p	binds	ARNT2
hsa-miR-590-3p	binds	MPP5
hsa-miR-590-3p	binds	CDKL2
hsa-miR-590-3p	binds	WNK1
hsa-miR-590-3p	binds	MATN2
hsa-miR-590-3p	binds	CA2
hsa-miR-590-3p	binds	GRB14
hsa-miR-590-3p	binds	PFKFB2
hsa-miR-590-3p	binds	DACH1
hsa-miR-590-3p	binds	C12orf34
hsa-miR-590-3p	binds	UNC13C
hsa-miR-590-3p	binds	EPB41L5
hsa-miR-590-3p	binds	OCLN
hsa-miR-590-3p	binds	GLRB
hsa-miR-590-3p	binds	PKHD1
hsa-miR-590-3p	binds	GNAI1
hsa-miR-590-3p	binds	FLRT3
hsa-miR-590-3p	binds	PRRG1
hsa-miR-590-3p	binds	NTRK2
hsa-miR-590-3p	binds	FAM108C1
hsa-miR-590-3p	binds	GOT2
hsa-miR-590-3p	binds	CXCL12
hsa-miR-590-3p	binds	RNF180
hsa-miR-590-3p	binds	MTMR10
hsa-miR-590-3p	binds	NRK
hsa-miR-590-3p	binds	NR4A2
hsa-miR-590-3p	binds	GK
hsa-miR-590-3p	binds	CGN
hsa-miR-590-3p	binds	ZNF503
hsa-miR-590-3p	binds	FABP1
hsa-miR-590-3p	binds	GPR155
hsa-miR-590-3p	binds	NHSL1
hsa-miR-590-3p	binds	CYP51A1
hsa-miR-590-3p	binds	CALCA
hsa-miR-590-3p	binds	COL4A4
hsa-miR-590-3p	binds	CNTN3
hsa-miR-590-3p	binds	FGF7
hsa-miR-590-3p	binds	EXOSC7
hsa-miR-590-3p	binds	MYO6
hsa-miR-590-3p	binds	ERBB4
hsa-miR-590-3p	binds	TYRO3
hsa-miR-590-3p	binds	MAMDC2
hsa-miR-590-3p	binds	DCN
hsa-miR-590-3p	binds	LRRC19
hsa-miR-590-3p	binds	GATM
hsa-miR-590-3p	binds	EHF
hsa-miR-590-3p	binds	NAV2
hsa-miR-590-3p	binds	CHODL
hsa-miR-590-3p	binds	BRCC3
hsa-miR-590-3p	binds	RASSF8
hsa-miR-590-3p	binds	DNM3
hsa-miR-590-3p	binds	GPM6B
hsa-miR-590-3p	binds	PPM1K
hsa-miR-590-3p	binds	ATP8B1
hsa-miR-590-3p	binds	C21orf62
hsa-miR-590-3p	binds	EPB41L4B
hsa-miR-590-3p	binds	FOXJ1
hsa-miR-590-3p	binds	IGSF11
hsa-miR-590-3p	binds	CTGF
hsa-miR-21-5p	binds	CHL1
hsa-miR-21-5p	binds	USP53
hsa-miR-21-5p	binds	ST6GAL1
hsa-miR-21-5p	binds	ALX1
hsa-miR-21-5p	binds	ST3GAL6
hsa-miR-21-5p	binds	MAPK10
hsa-miR-21-5p	binds	LUM
hsa-miR-21-5p	binds	ZDHHC2
hsa-miR-21-5p	binds	BTG2
hsa-miR-21-5p	binds	TNFRSF11B
hsa-miR-21-5p	binds	MATN2
hsa-miR-21-5p	binds	CADM1
hsa-miR-21-5p	binds	SCRN1
hsa-miR-21-5p	binds	KLF5
hsa-miR-21-5p	binds	ARHGAP24
hsa-miR-21-5p	binds	SACM1L
hsa-miR-21-5p	binds	KCNMB2
hsa-miR-21-5p	binds	AKIRIN1
hsa-miR-21-5p	binds	THRB
hsa-miR-21-5p	binds	SLC16A10
hsa-miR-34a-5p	binds	SAMD12
hsa-miR-34a-5p	binds	ACSL4
hsa-miR-34a-5p	binds	ANK3
hsa-miR-34a-5p	binds	PRKD1
hsa-miR-34a-5p	binds	CR2
hsa-miR-34a-5p	binds	STAC2
hsa-miR-34a-5p	binds	KITLG
hsa-miR-34a-5p	binds	CDKN1C
hsa-miR-34a-5p	binds	FAM167A
hsa-miR-34a-5p	binds	SGPP1
hsa-miR-34a-5p	binds	SLC6A17
hsa-miR-34a-5p	binds	MPPED2
hsa-miR-34a-5p	binds	DDN
hsa-miR-34a-5p	binds	NR4A2
hsa-miR-34a-5p	binds	CAPN6
hsa-miR-34a-5p	binds	CTDSPL
hsa-miR-34a-5p	binds	ProSAPiP1
hsa-miR-34a-5p	binds	GAS1
hsa-miR-34a-5p	binds	NOS1AP
hsa-miR-34a-5p	binds	CALB1
hsa-miR-34a-5p	binds	PDGFRA
hsa-miR-34a-5p	binds	ANK2
hsa-miR-34a-5p	binds	LPHN1
hsa-miR-34a-5p	binds	SLC16A2
hsa-miR-34a-5p	binds	BTBD11
hsa-miR-34a-5p	binds	MPP2
hsa-miR-34a-5p	binds	SYT1
hsa-miR-34a-5p	binds	DAAM1
hsa-miR-34a-5p	binds	PKIA
hsa-miR-33b-5p	binds	RIMBP2
hsa-miR-33b-5p	binds	ESRRG
hsa-miR-33b-5p	binds	ANK3
hsa-miR-33b-5p	binds	RASSF8
hsa-miR-33b-5p	binds	SLC26A7
hsa-miR-33b-5p	binds	CHN2
hsa-miR-33b-5p	binds	ATP8B1
hsa-miR-33b-5p	binds	NR4A2
hsa-miR-33b-5p	binds	DACH1
hsa-miR-33b-5p	binds	METRNL
hsa-miR-33b-5p	binds	ATP1B1
hsa-miR-33b-5p	binds	PPARGC1A
hsa-miR-33b-5p	binds	HOMER1
hsa-miR-33b-5p	binds	GAS1
hsa-miR-33b-5p	binds	PFN2
hsa-miR-33b-5p	binds	PDGFRA
hsa-miR-33b-5p	binds	CROT
hsa-miR-33b-5p	binds	MRPL33
hsa-miR-33b-5p	binds	MBOAT2
hsa-miR-33b-5p	binds	DENND1B
hsa-miR-33b-5p	binds	TMEM86A
hsa-miR-33b-5p	binds	NAP1L2
hsa-miR-33b-5p	binds	SIX4
hsa-miR-33b-5p	binds	SLC25A25
hsa-miR-361-3p	binds	CADM4
hsa-miR-361-3p	binds	AJAP1
hsa-miR-361-3p	binds	TGFBR3
hsa-miR-361-3p	binds	TSPAN1
hsa-miR-24-2-5p	binds	CALB1
hsa-miR-24-2-5p	binds	PCDH9
hsa-miR-7-5p	binds	IGF2BP2
hsa-miR-7-5p	binds	ESRRG
hsa-miR-7-5p	binds	ACSL4
hsa-miR-7-5p	binds	DIRAS1
hsa-miR-7-5p	binds	HOXB5
hsa-miR-7-5p	binds	SLC16A7
hsa-miR-7-5p	binds	SEMA6D
hsa-miR-7-5p	binds	ERBB4
hsa-miR-7-5p	binds	GAL3ST3
hsa-miR-7-5p	binds	DACH1
hsa-miR-7-5p	binds	SLC5A3
hsa-miR-7-5p	binds	HPCAL4
hsa-miR-7-5p	binds	ProSAPiP1
hsa-miR-7-5p	binds	CHD3
hsa-miR-7-5p	binds	SLC38A4
hsa-miR-7-5p	binds	GALNT3
hsa-miR-7-5p	binds	PFN2
hsa-miR-7-5p	binds	NR4A3
hsa-miR-7-5p	binds	WASF3
hsa-miR-7-5p	binds	MAPK4
hsa-miR-7-5p	binds	C1orf226
hsa-miR-7-5p	binds	NDUFA4
hsa-miR-210	binds	NDUFA4
hsa-miR-210	binds	GPD1L
hsa-miR-16-2-3p	binds	SCN2A
hsa-miR-142-5p	binds	GNAI1
hsa-miR-142-5p	binds	KITLG
hsa-miR-142-5p	binds	NEDD4L
hsa-miR-142-5p	binds	EYA4
hsa-miR-142-5p	binds	CADM1
hsa-miR-142-5p	binds	CXADR
hsa-miR-142-5p	binds	MTMR10
hsa-miR-142-5p	binds	ATP1B1
hsa-miR-142-5p	binds	ZNF503
hsa-miR-142-5p	binds	SACM1L
hsa-miR-142-5p	binds	ANKRD9
hsa-miR-142-5p	binds	PIP4K2C
hsa-miR-142-5p	binds	MAGI2
hsa-miR-142-5p	binds	MYO6
hsa-miR-142-5p	binds	TBC1D9
hsa-miR-142-5p	binds	OXCT1
hsa-miR-142-5p	binds	SIX4
hsa-miR-142-5p	binds	KLHL14
hsa-miR-142-5p	binds	SYNJ2BP
hsa-miR-142-5p	binds	NPNT
hsa-miR-142-5p	binds	MYO10
hsa-miR-142-5p	binds	CHAC1
hsa-miR-142-5p	binds	ADAMTS16
hsa-miR-142-5p	binds	HSD11B1
hsa-miR-142-5p	binds	PIP5K1B
hsa-miR-142-5p	binds	HOXD8
hsa-miR-142-5p	binds	KIT
hsa-miR-142-5p	binds	SGPP1
hsa-miR-142-5p	binds	MAP9
hsa-miR-142-5p	binds	CYP26B1
hsa-miR-142-5p	binds	NCOA7
hsa-miR-142-5p	binds	TRIM2
hsa-miR-142-5p	binds	RHOBTB3
hsa-miR-142-5p	binds	TCF21
hsa-miR-142-5p	binds	PDGFRA
hsa-miR-142-5p	binds	UST
hsa-miR-142-5p	binds	TBX3
hsa-miR-584-5p	binds	SAMD12
hsa-miR-584-5p	binds	ANK3
hsa-miR-584-5p	binds	FLRT3
hsa-miR-584-5p	binds	FAM108C1
hsa-miR-584-5p	binds	HOXA11
